# Supplementary figures and images for: Next Generation Sequencing of Chromosome-Specific Libraries Sheds Light on Genome Evolution in Paleotetraploid Sterlet (Acipenser ruthenus)
Source: MDPI journal article supplement (doi:10.3390/genes8110318), 2017-11-10

# R51.LepOcu1

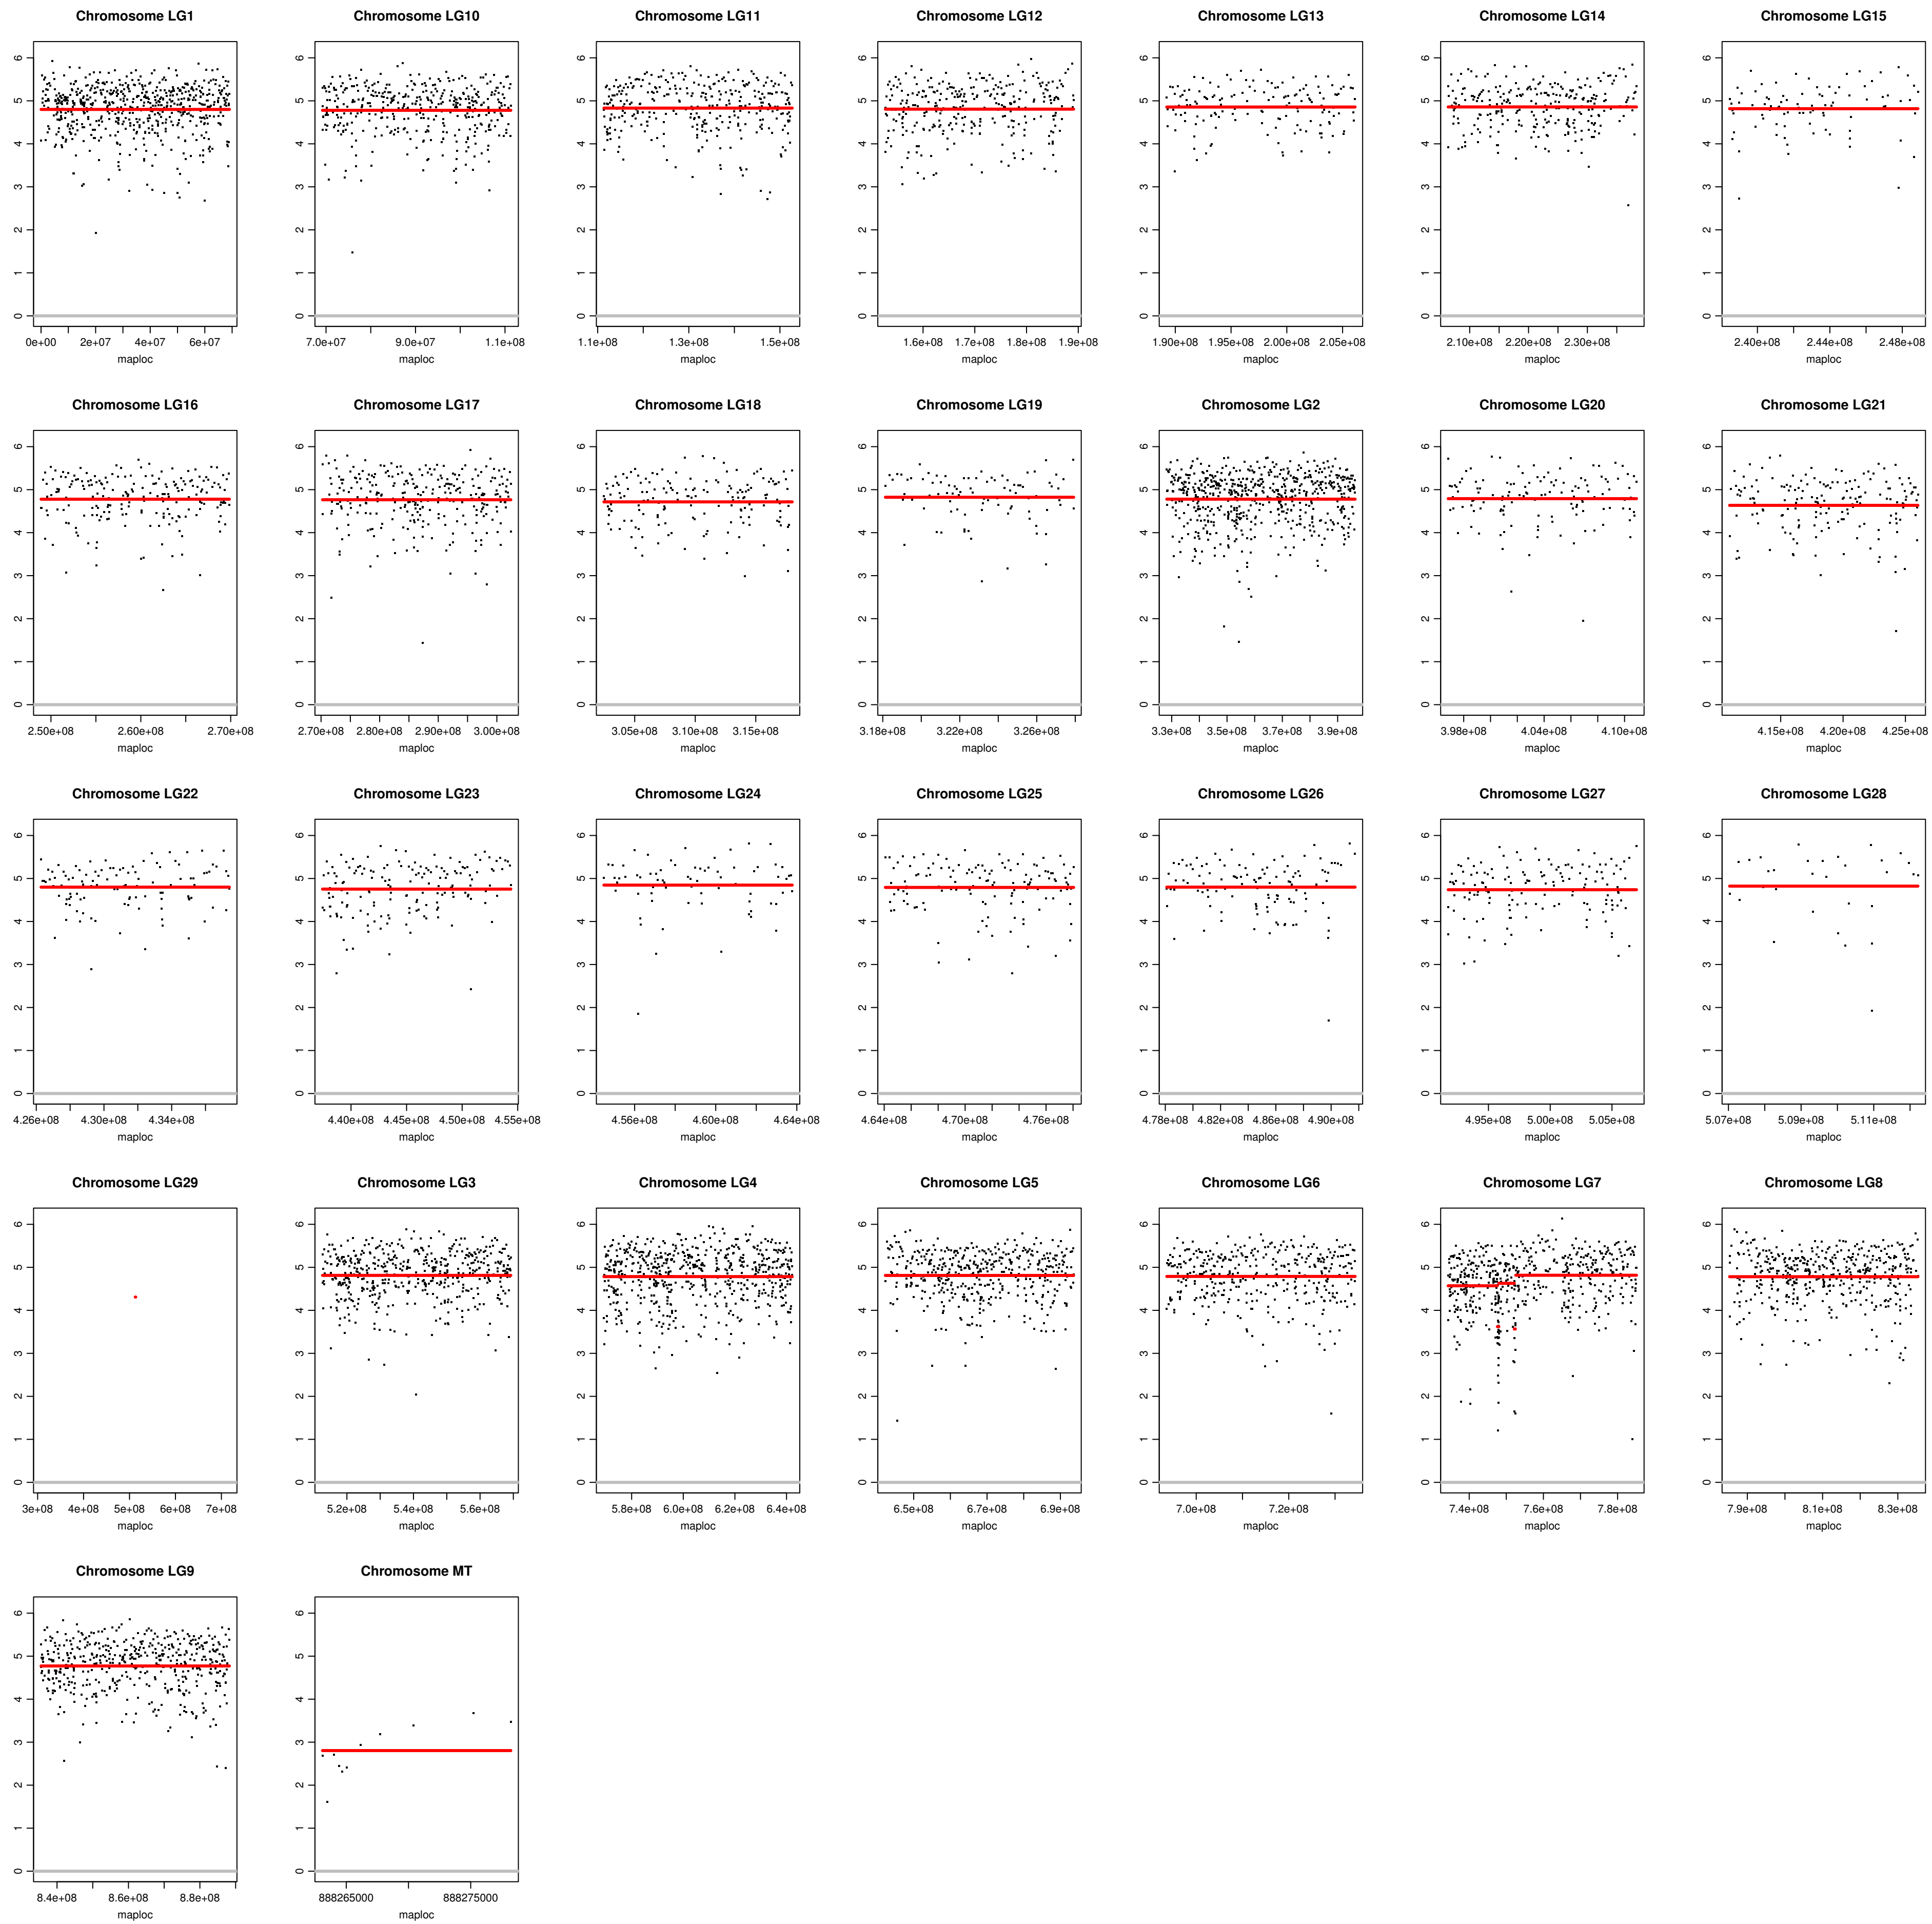

# R53.LepOcu1

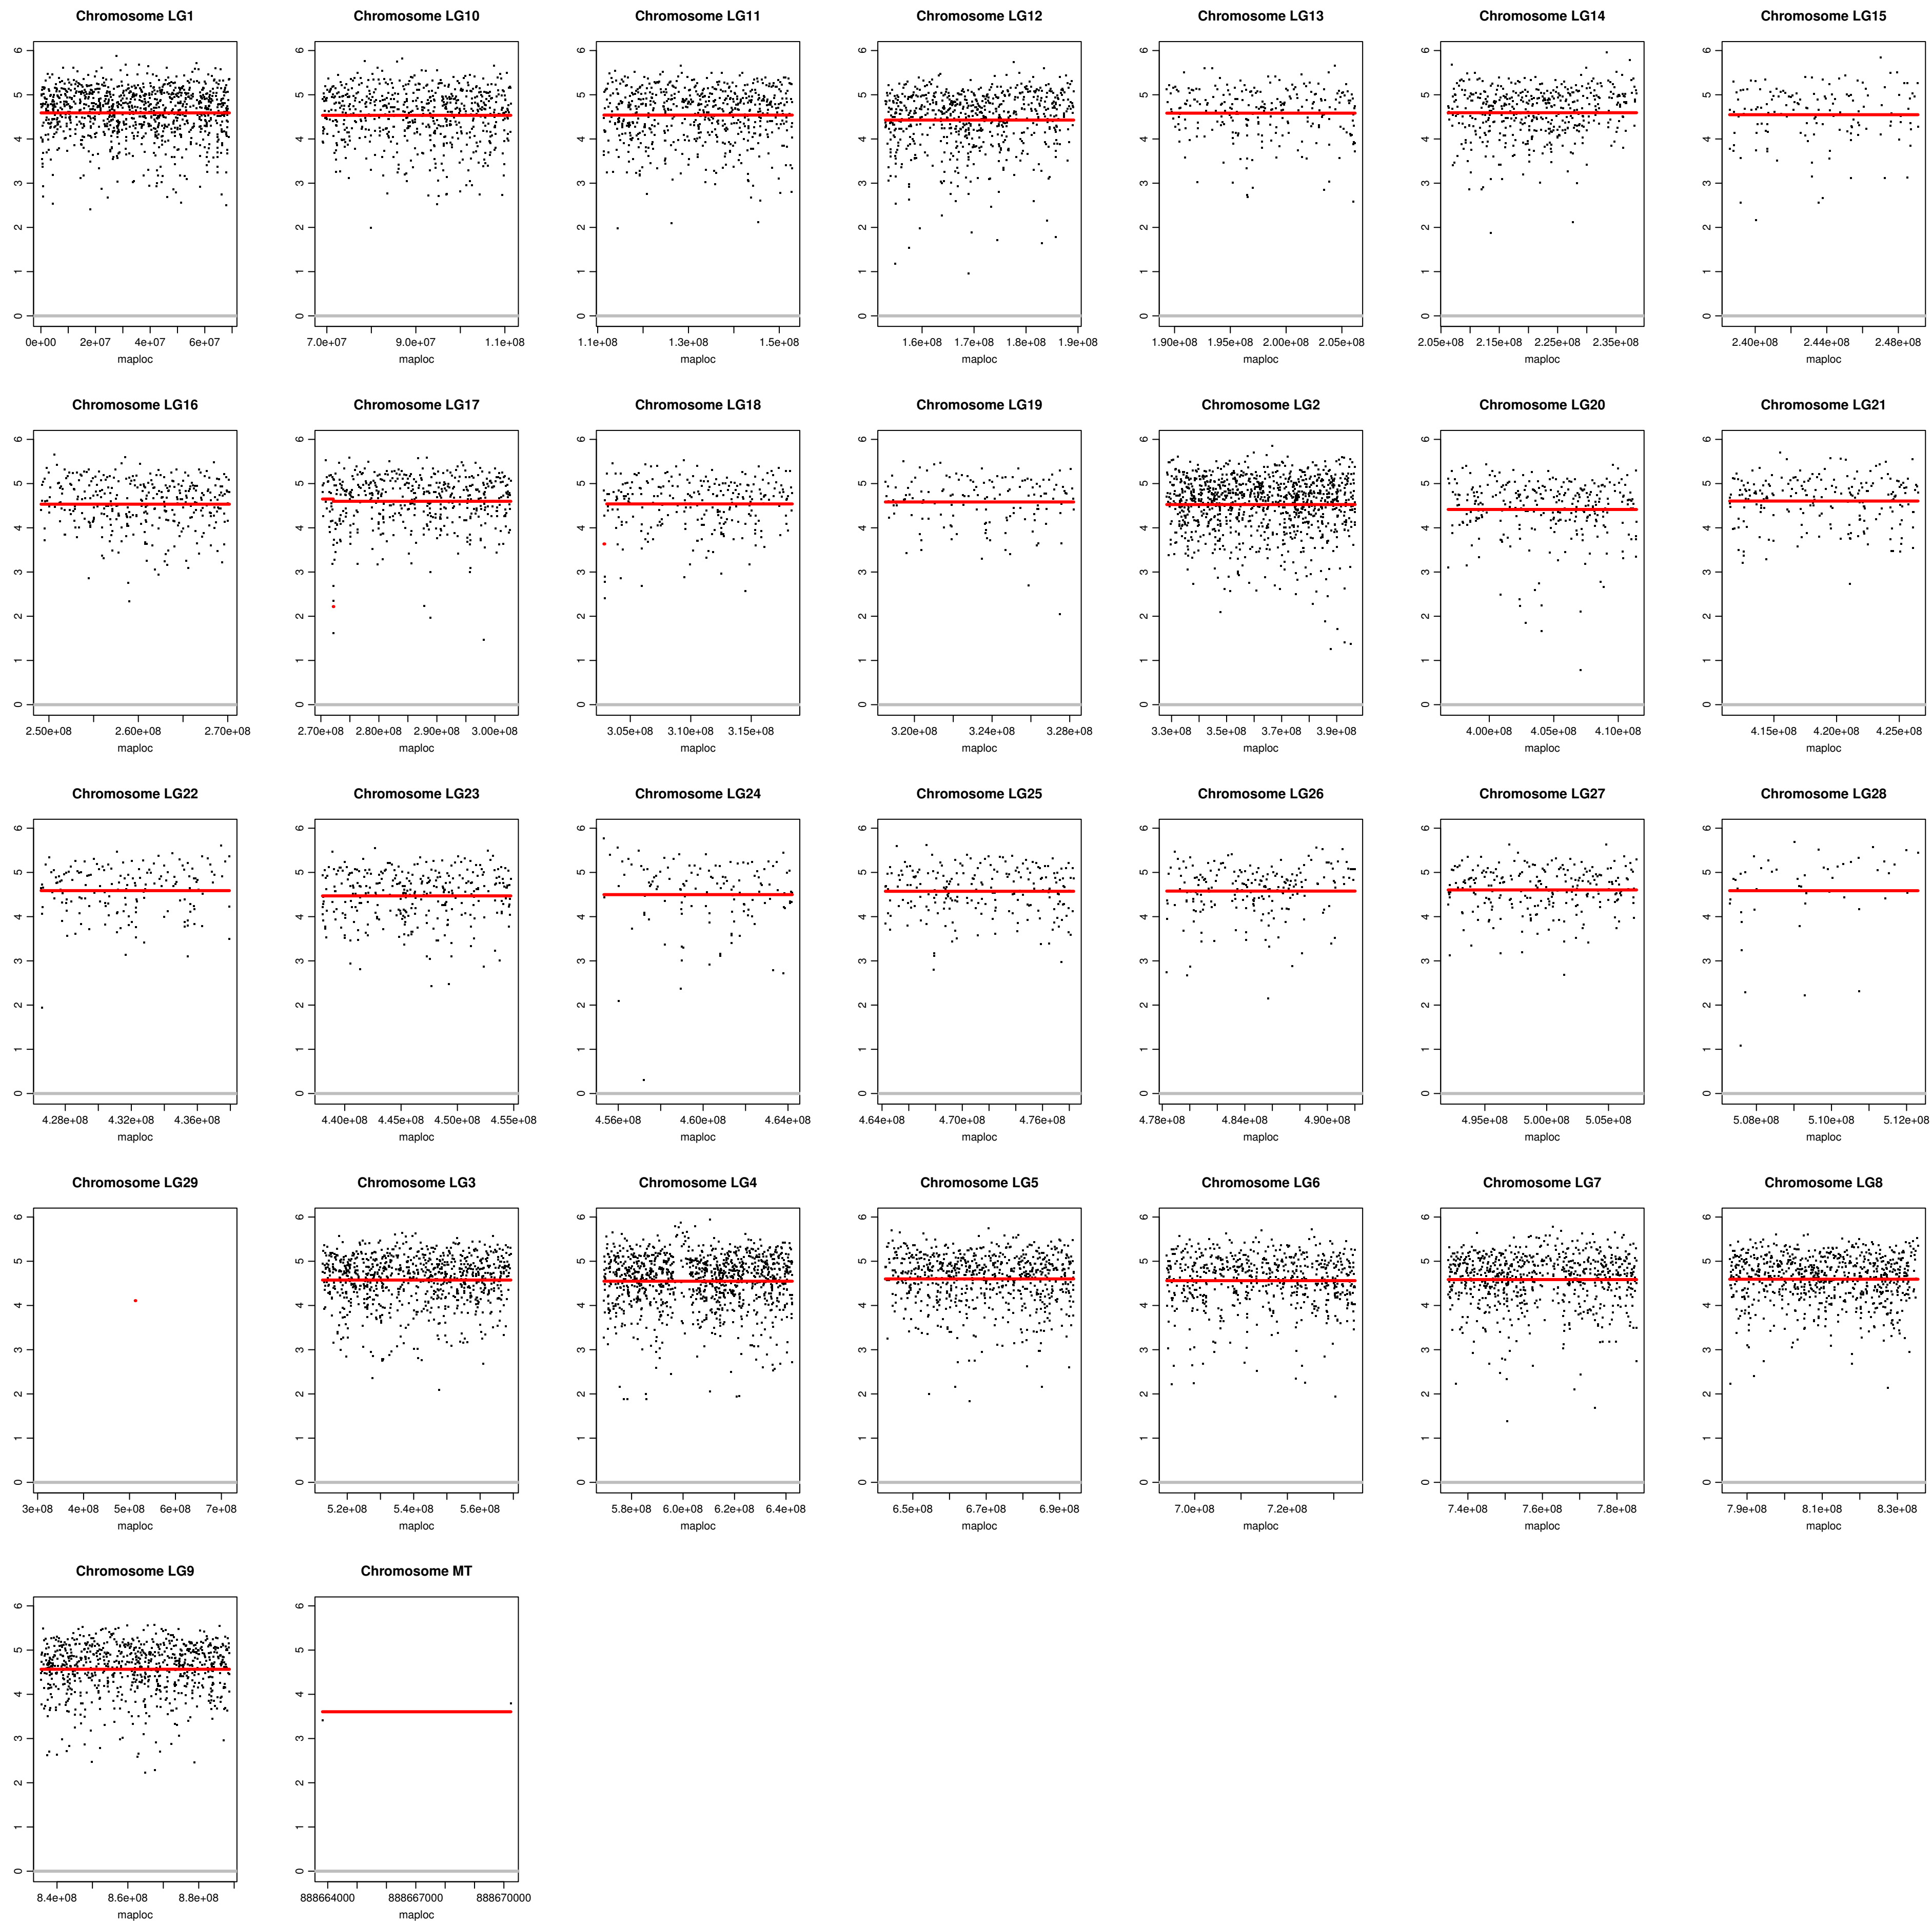

**R55.LepOcu1**

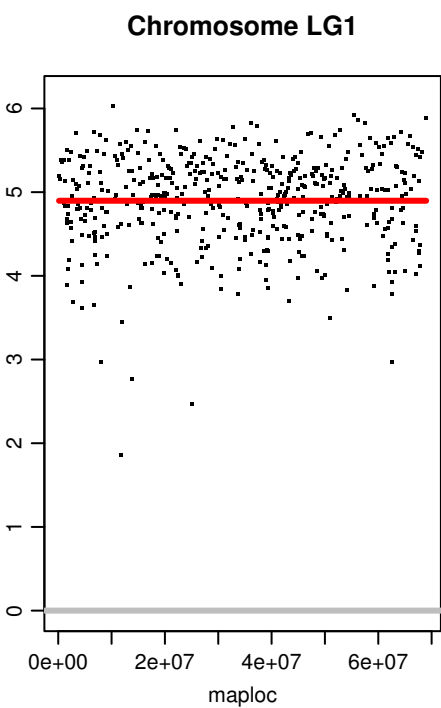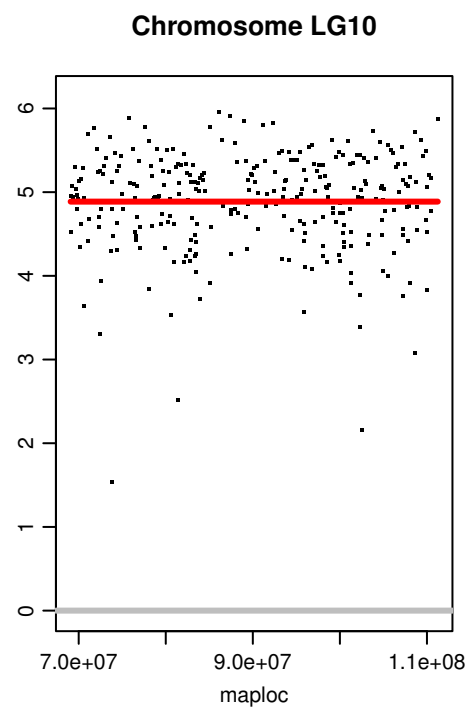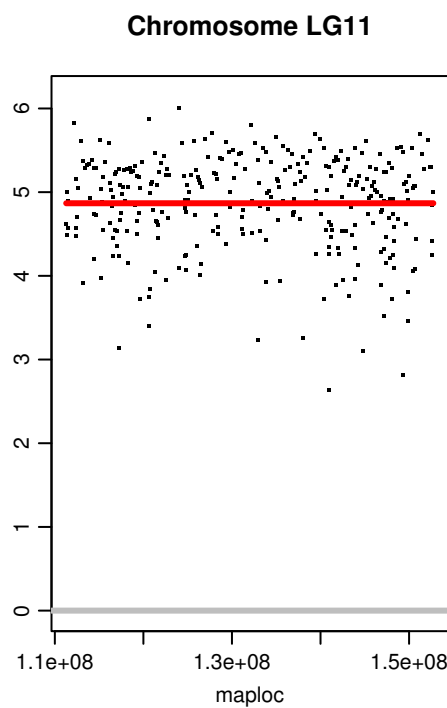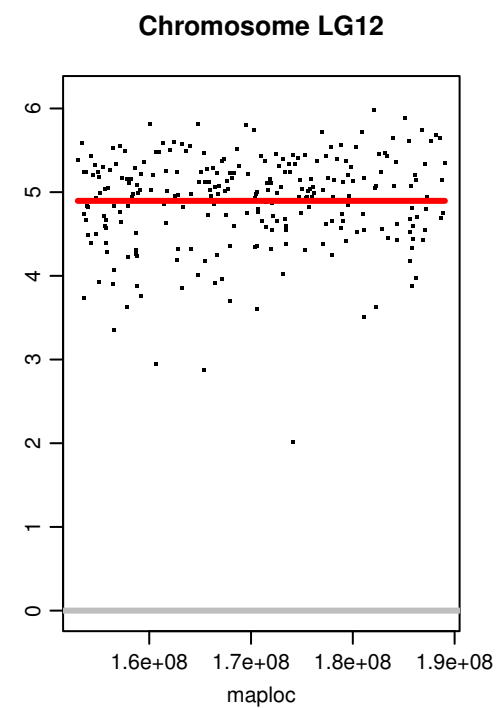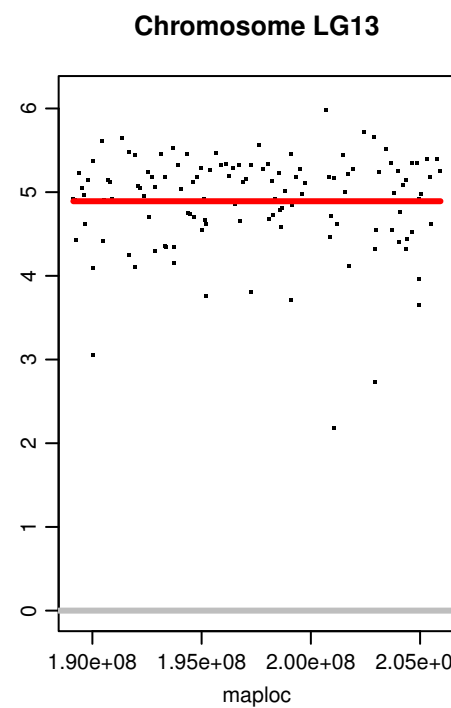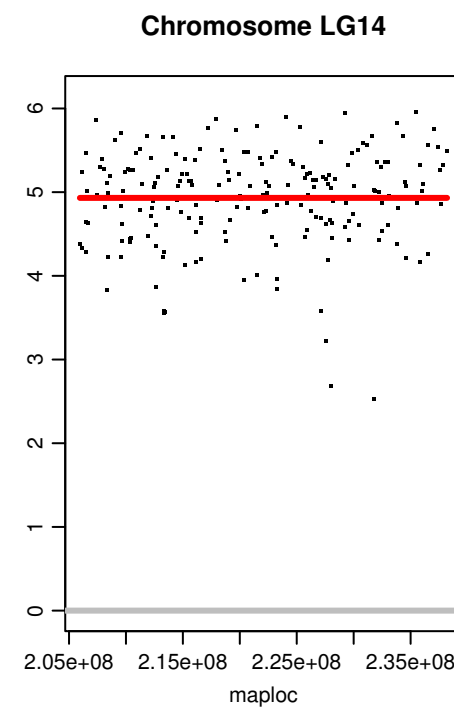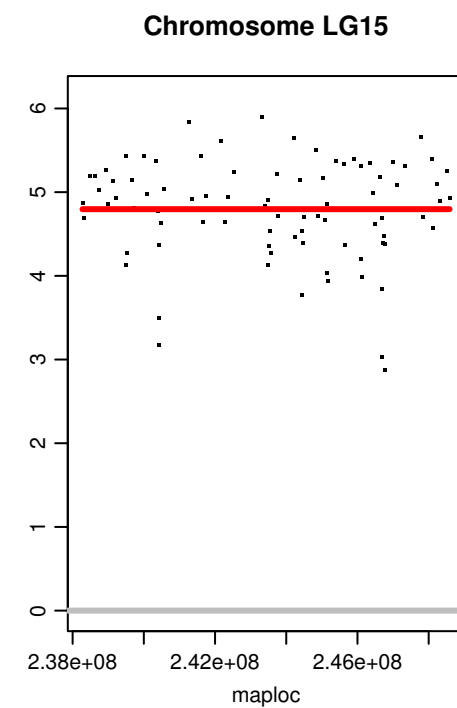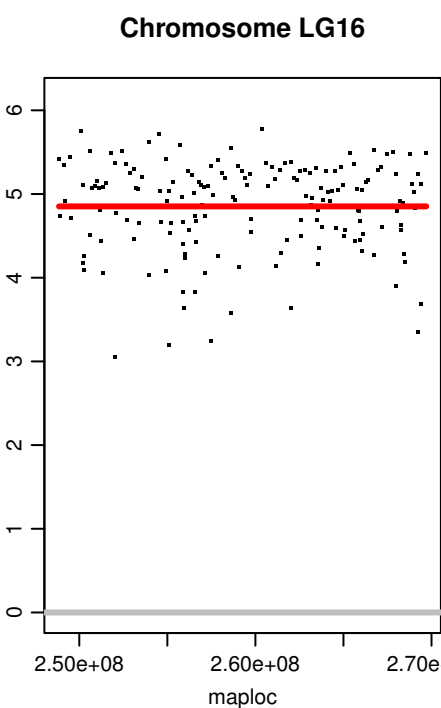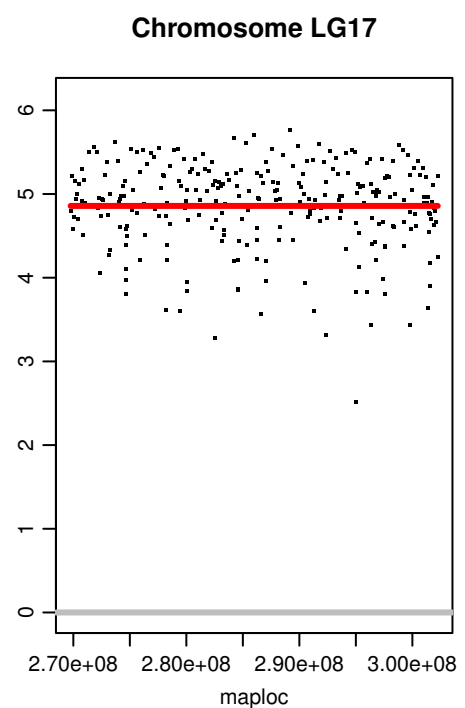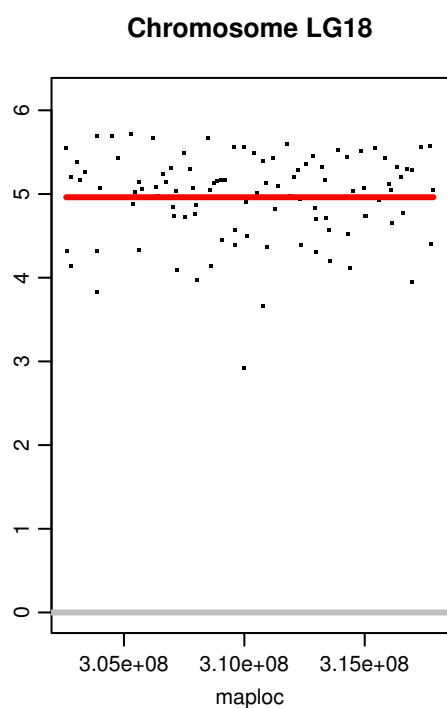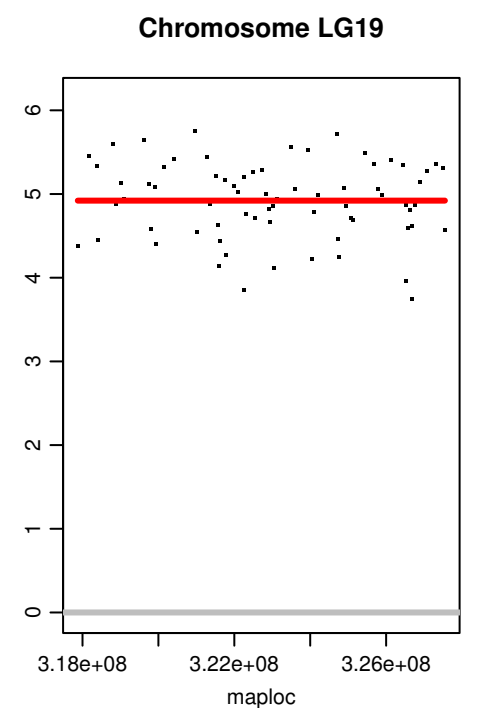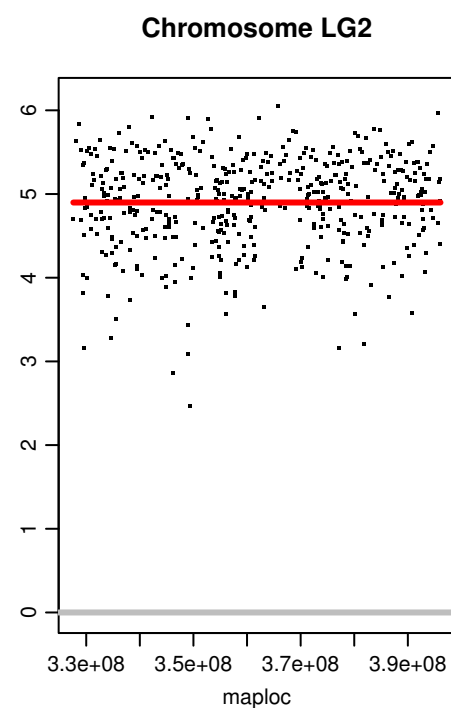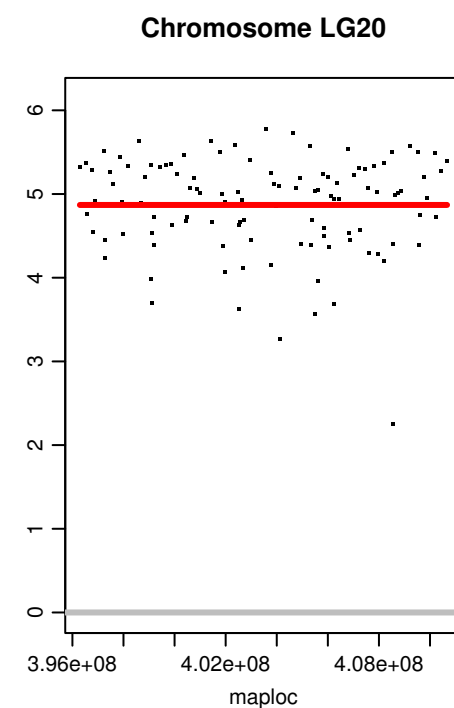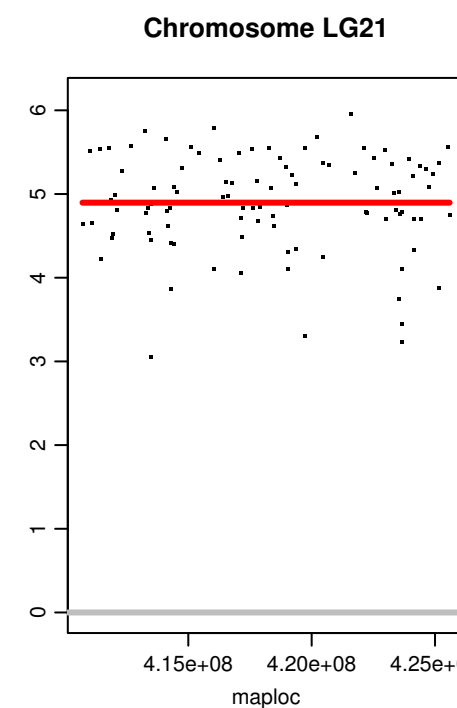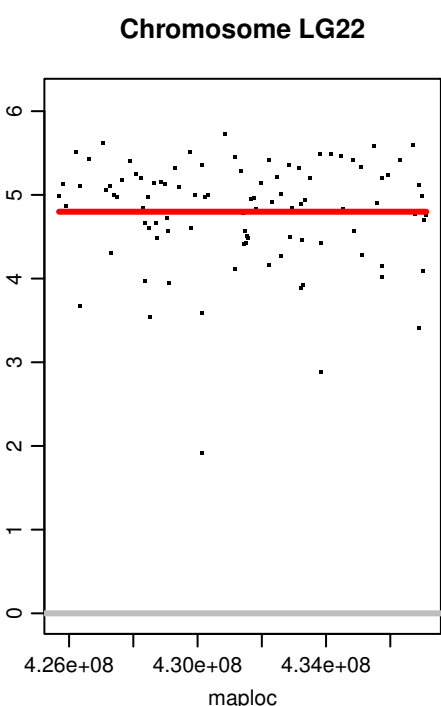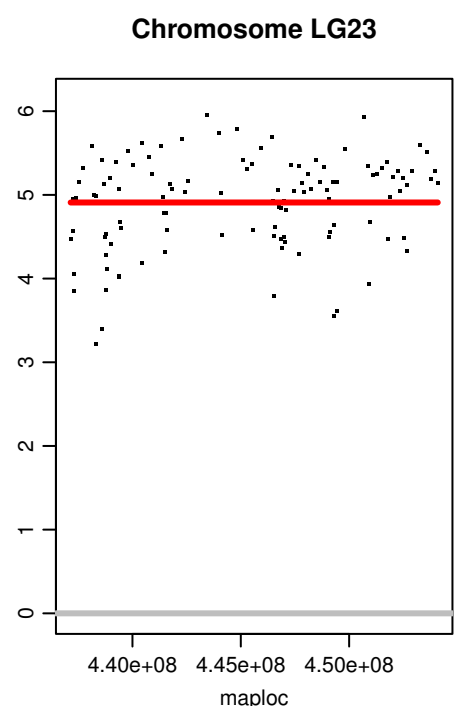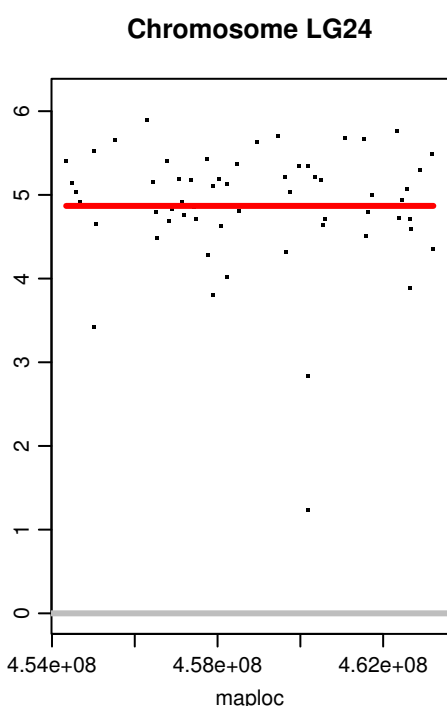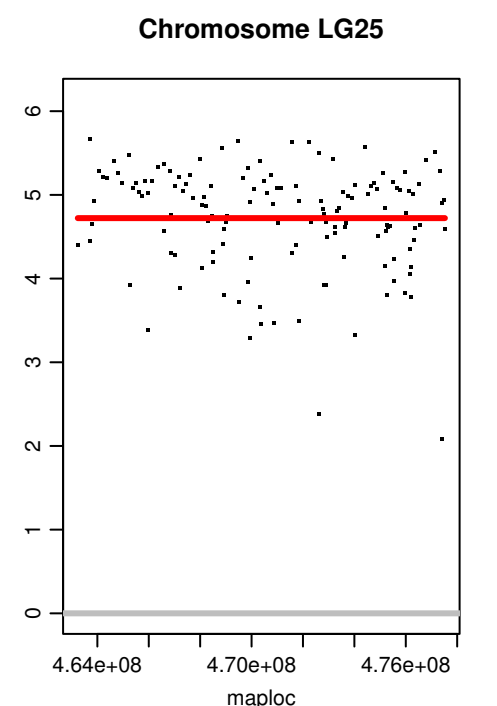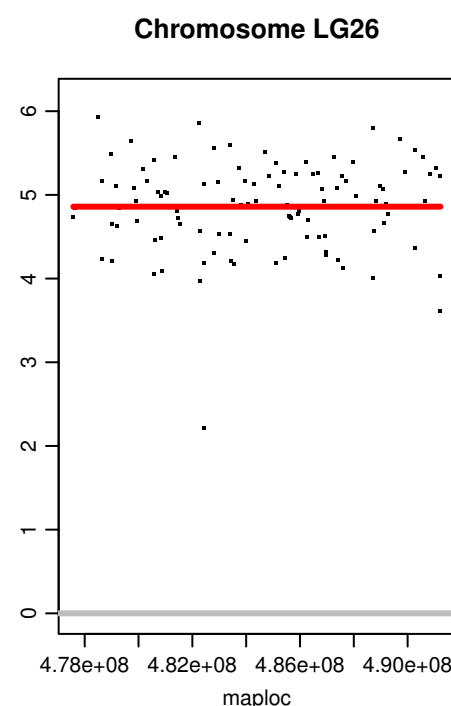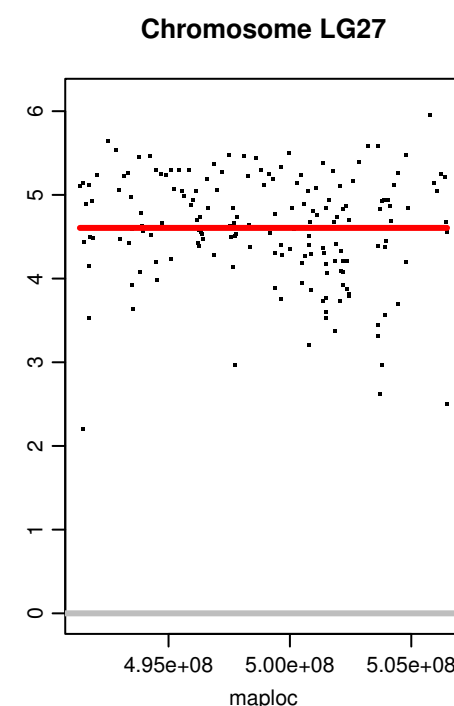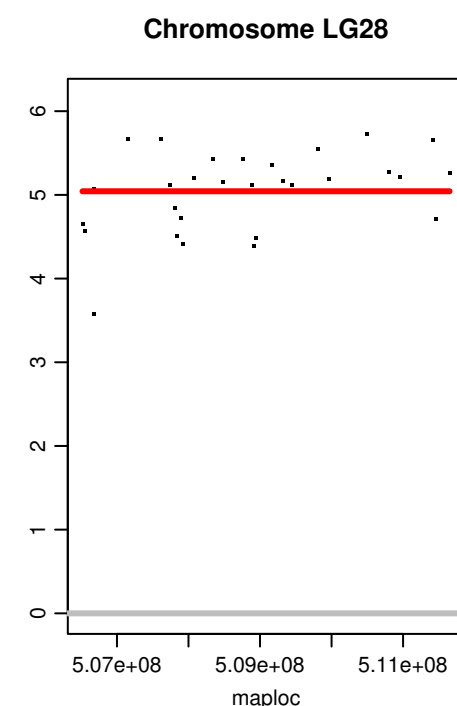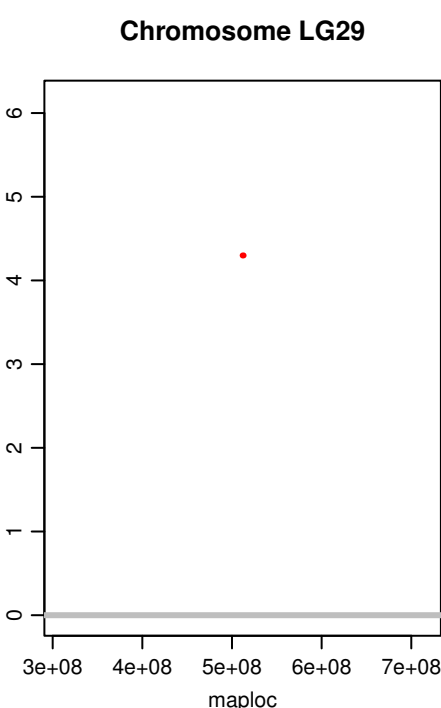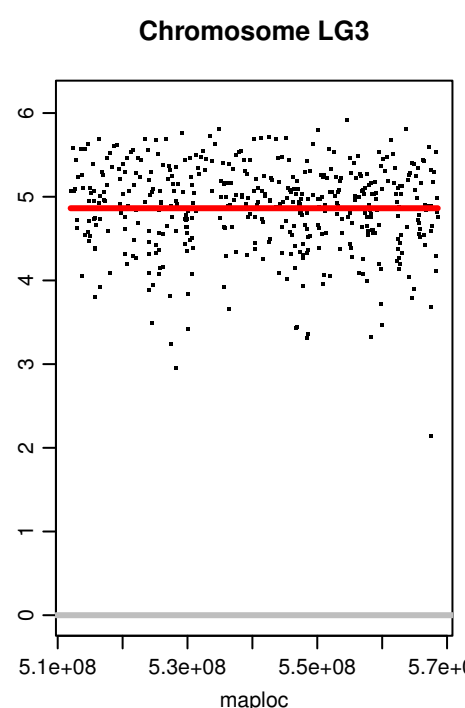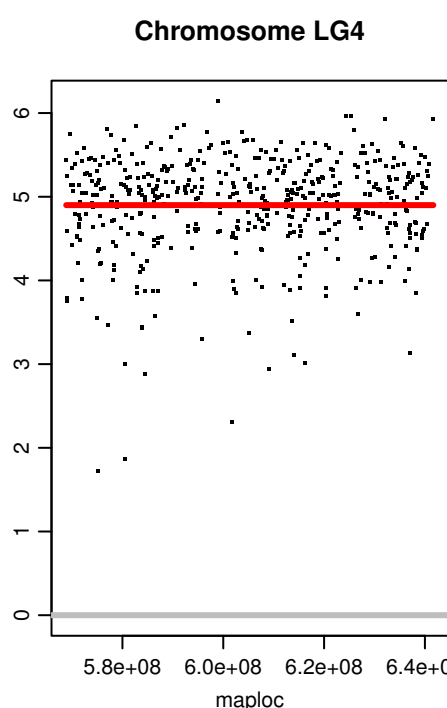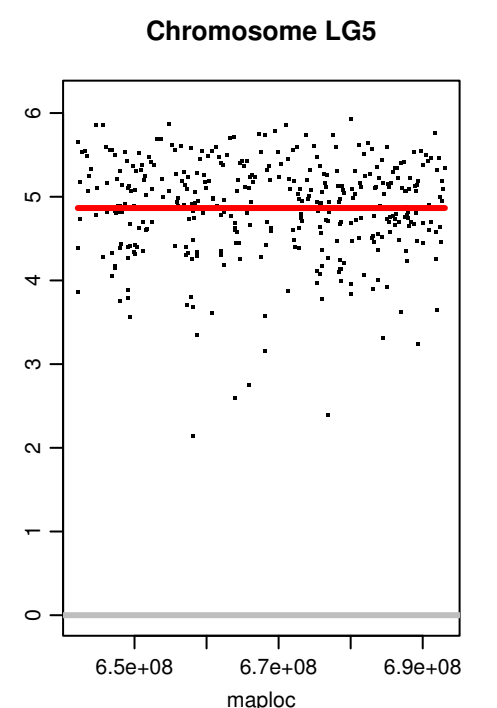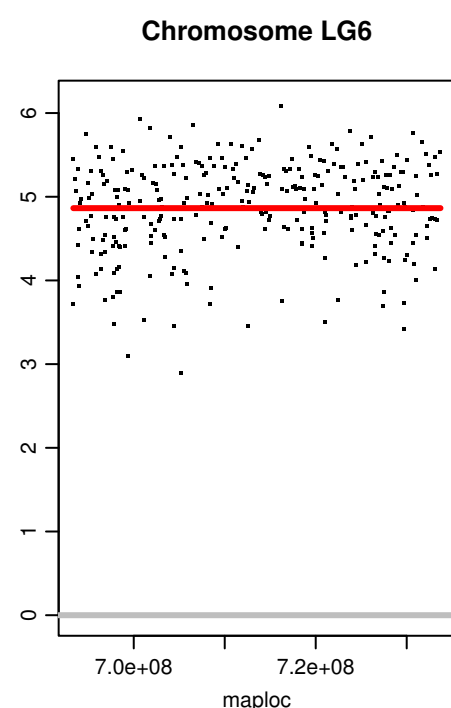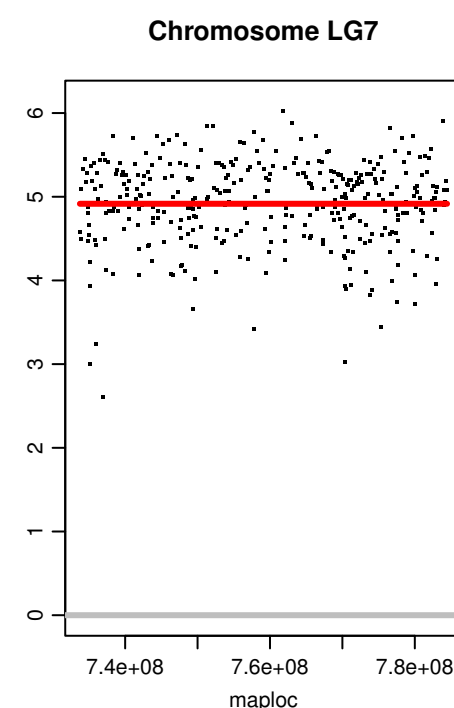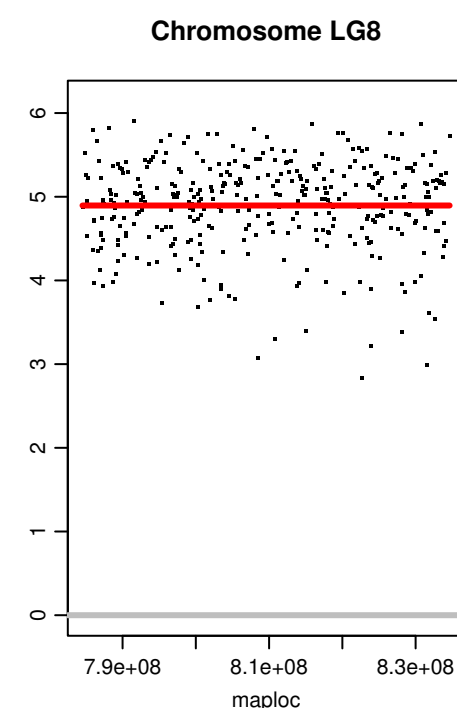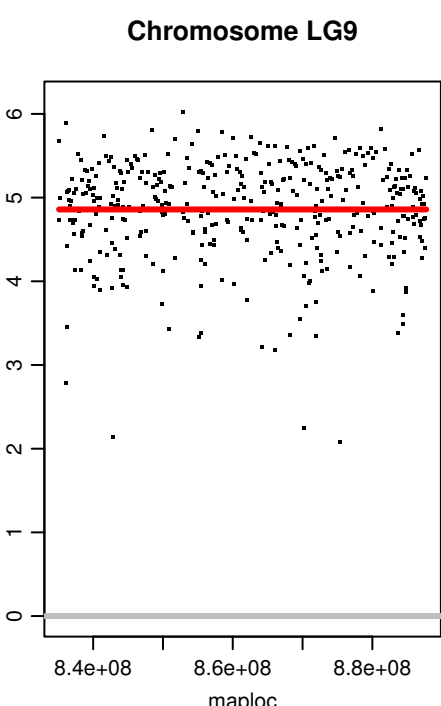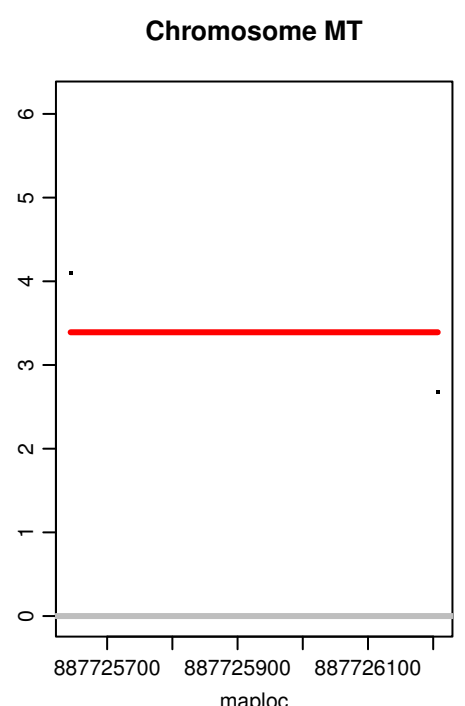

R56.LepOcu1

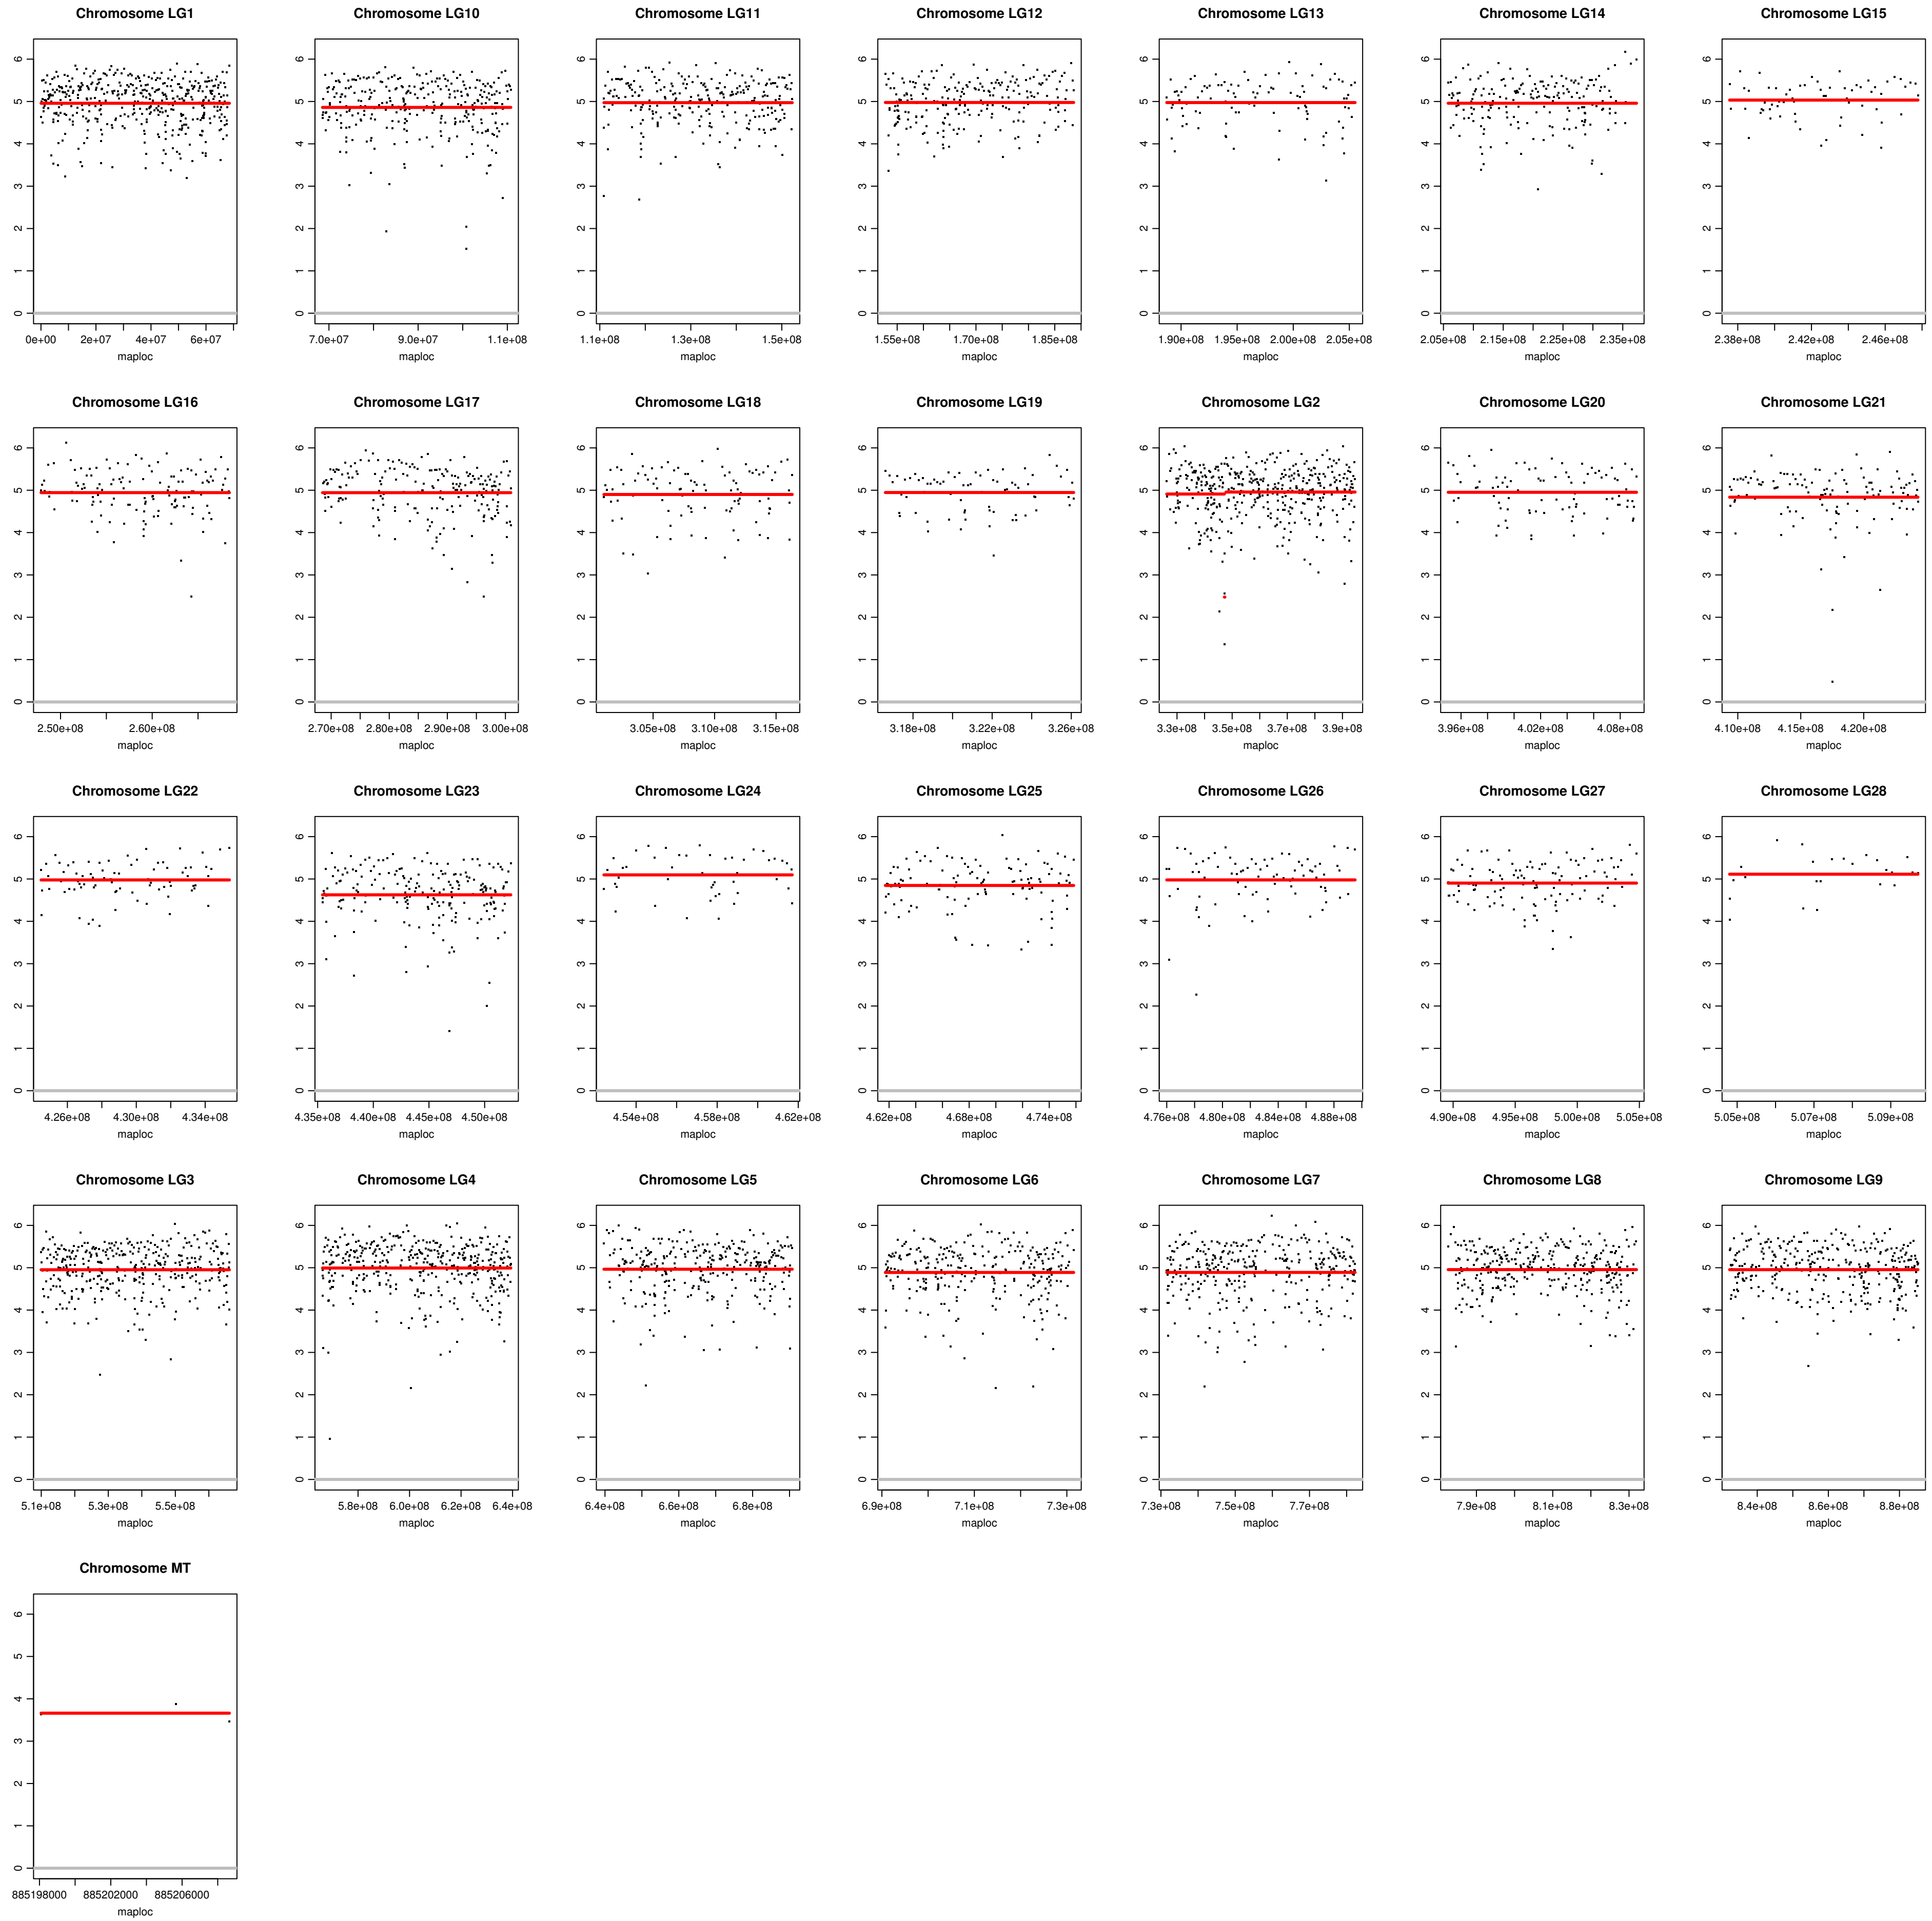

# R57.LepOcu1

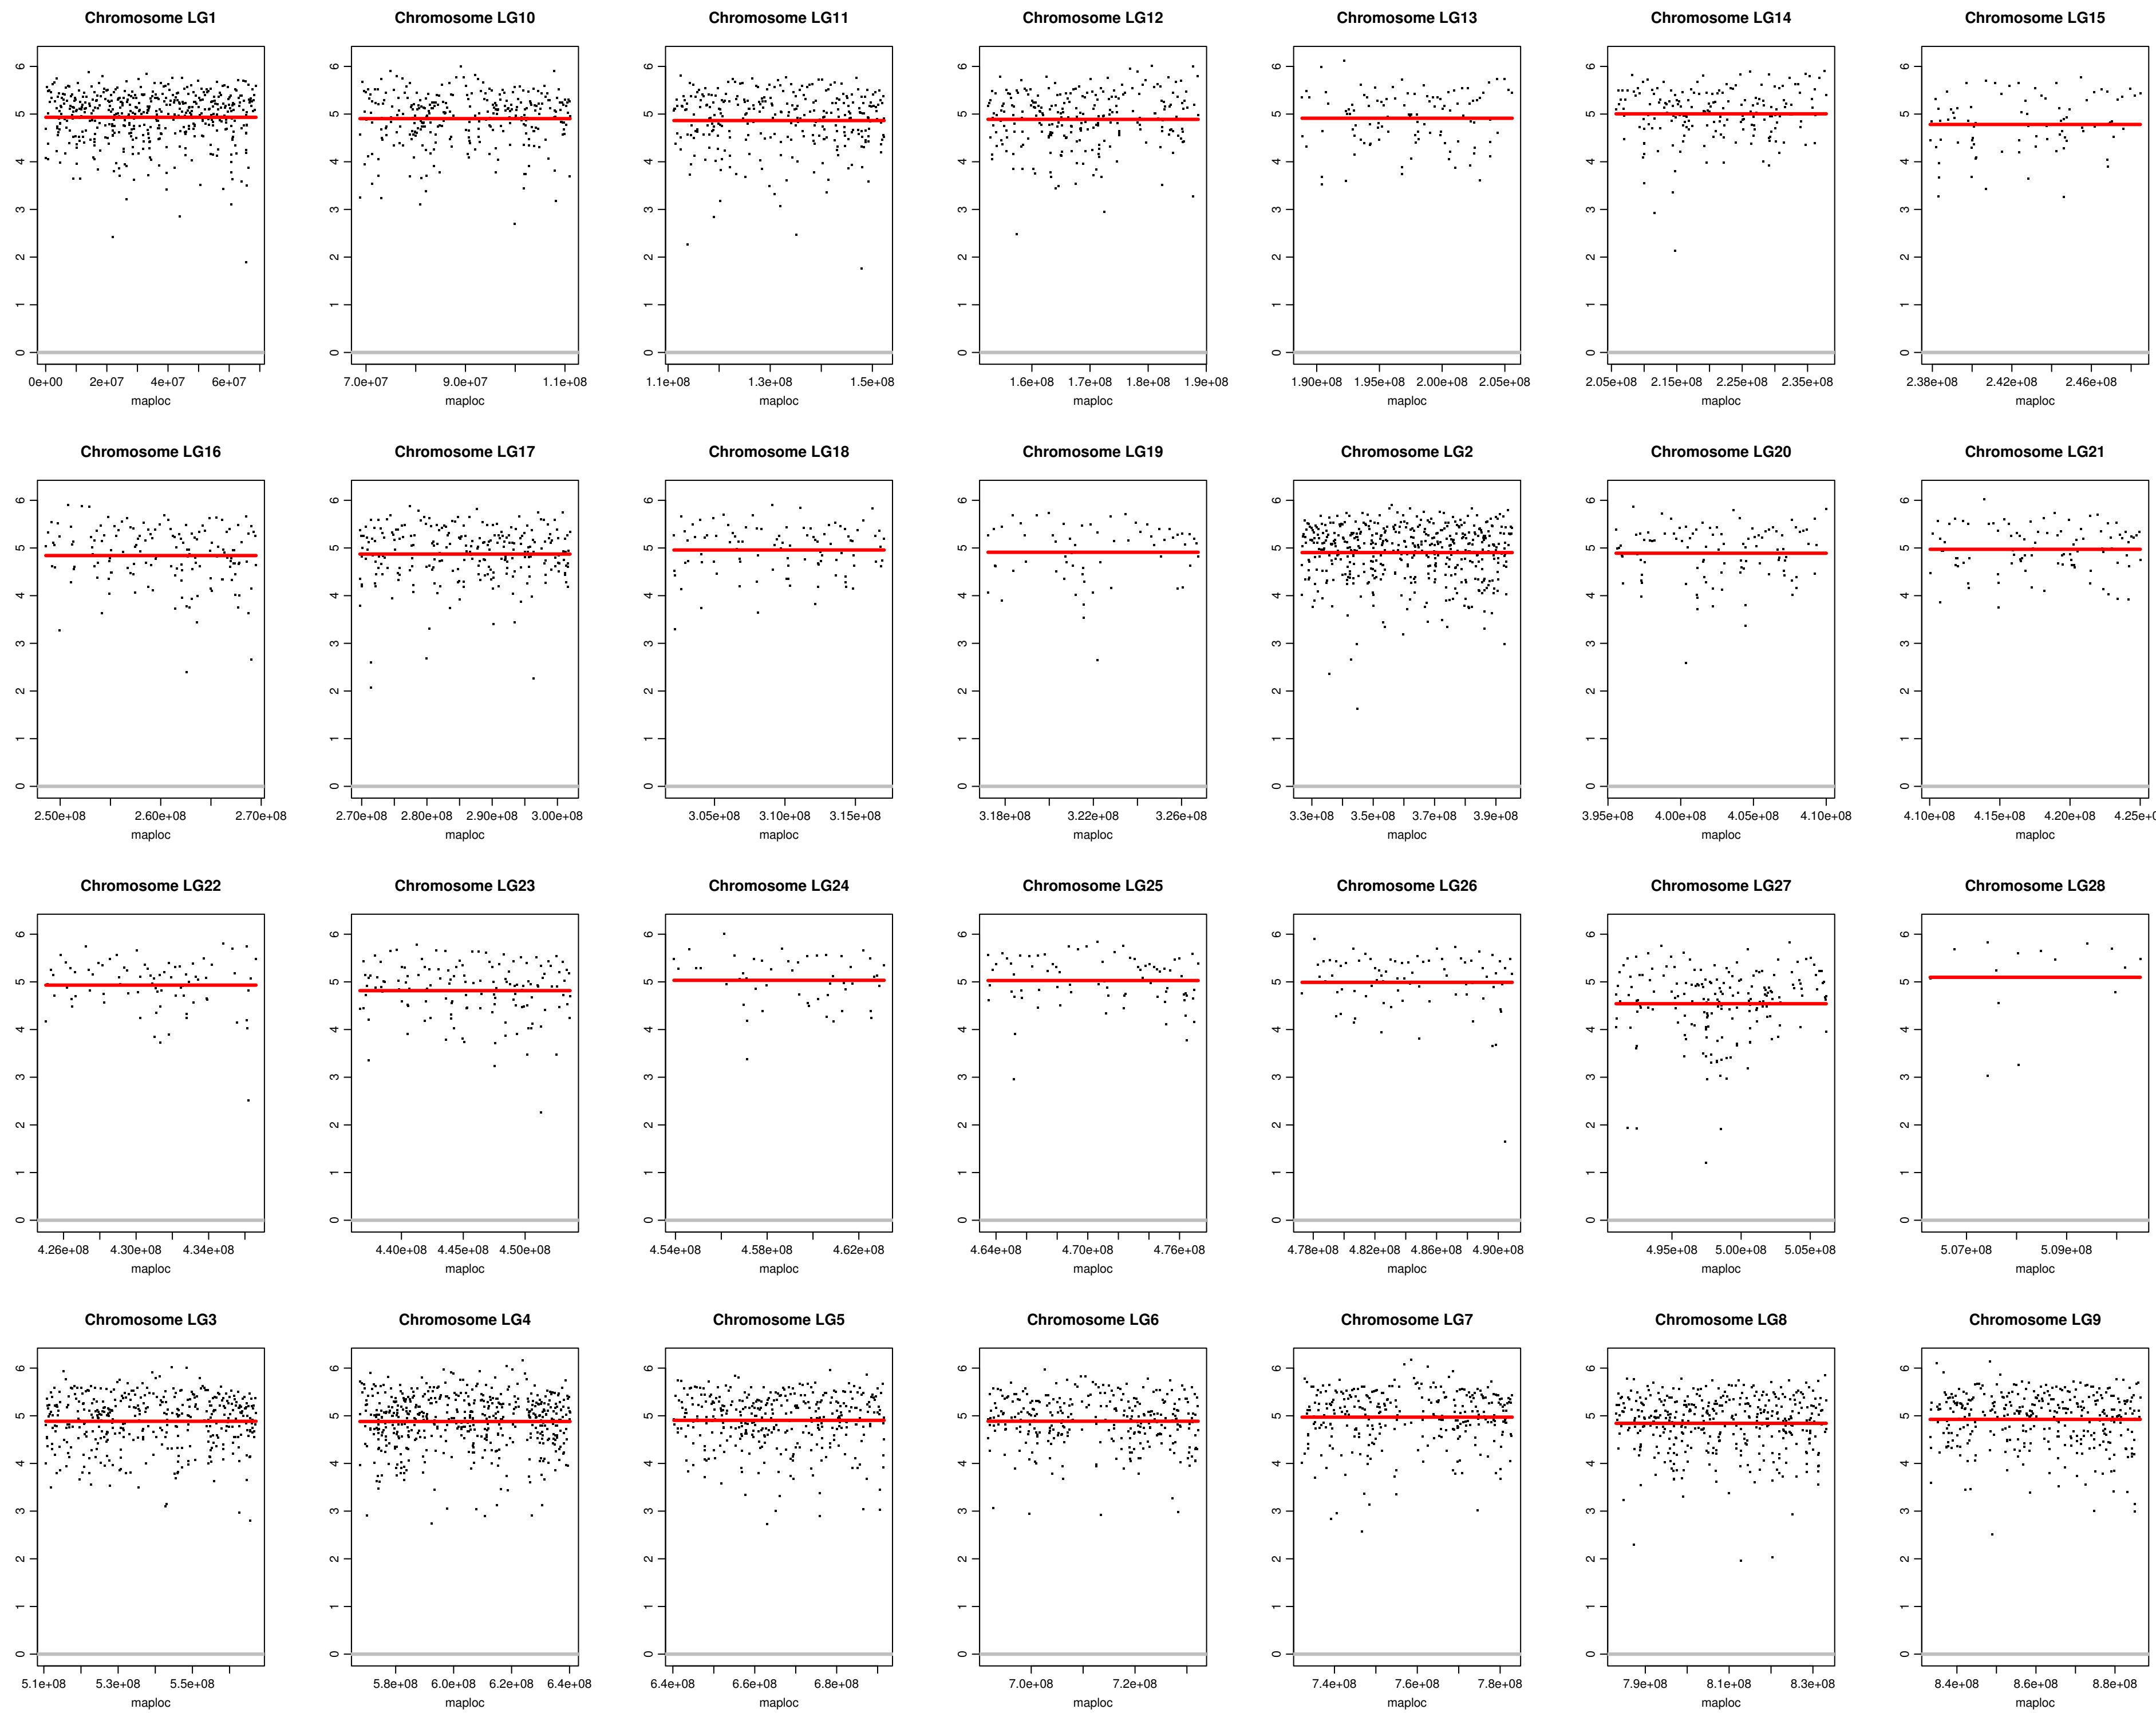

# R58.LepOcu1

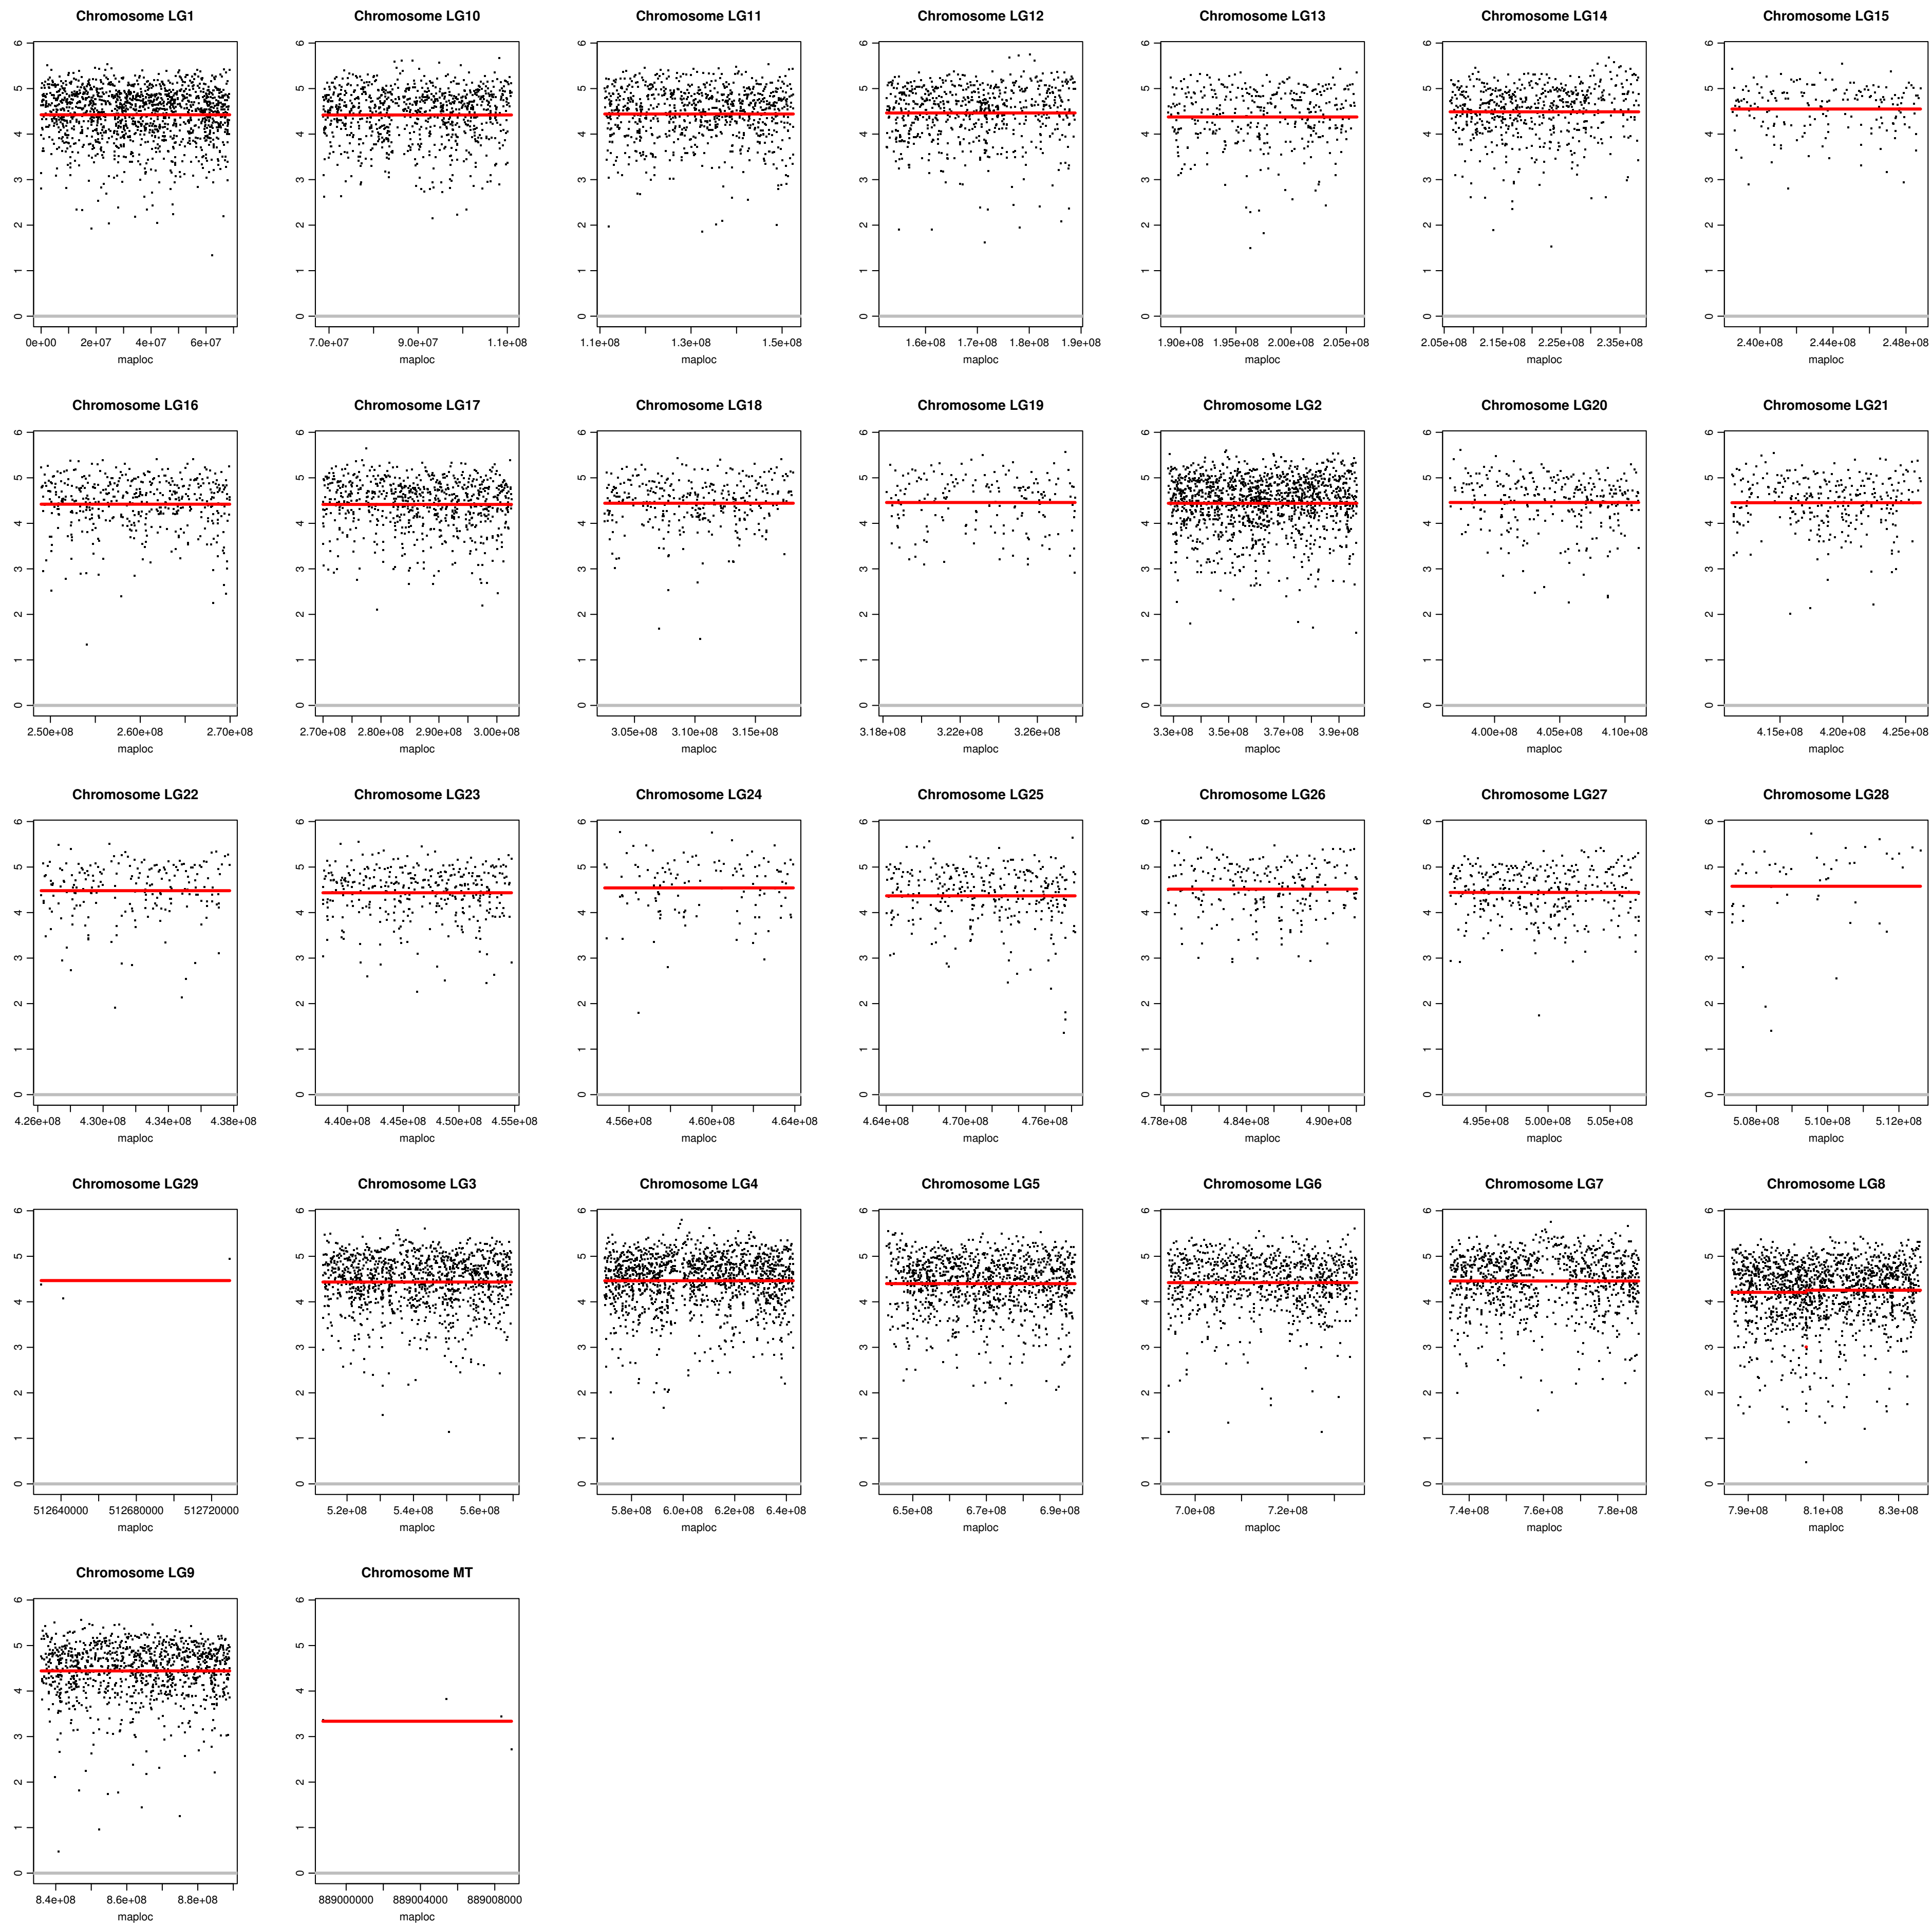

# R59.LepOcu1

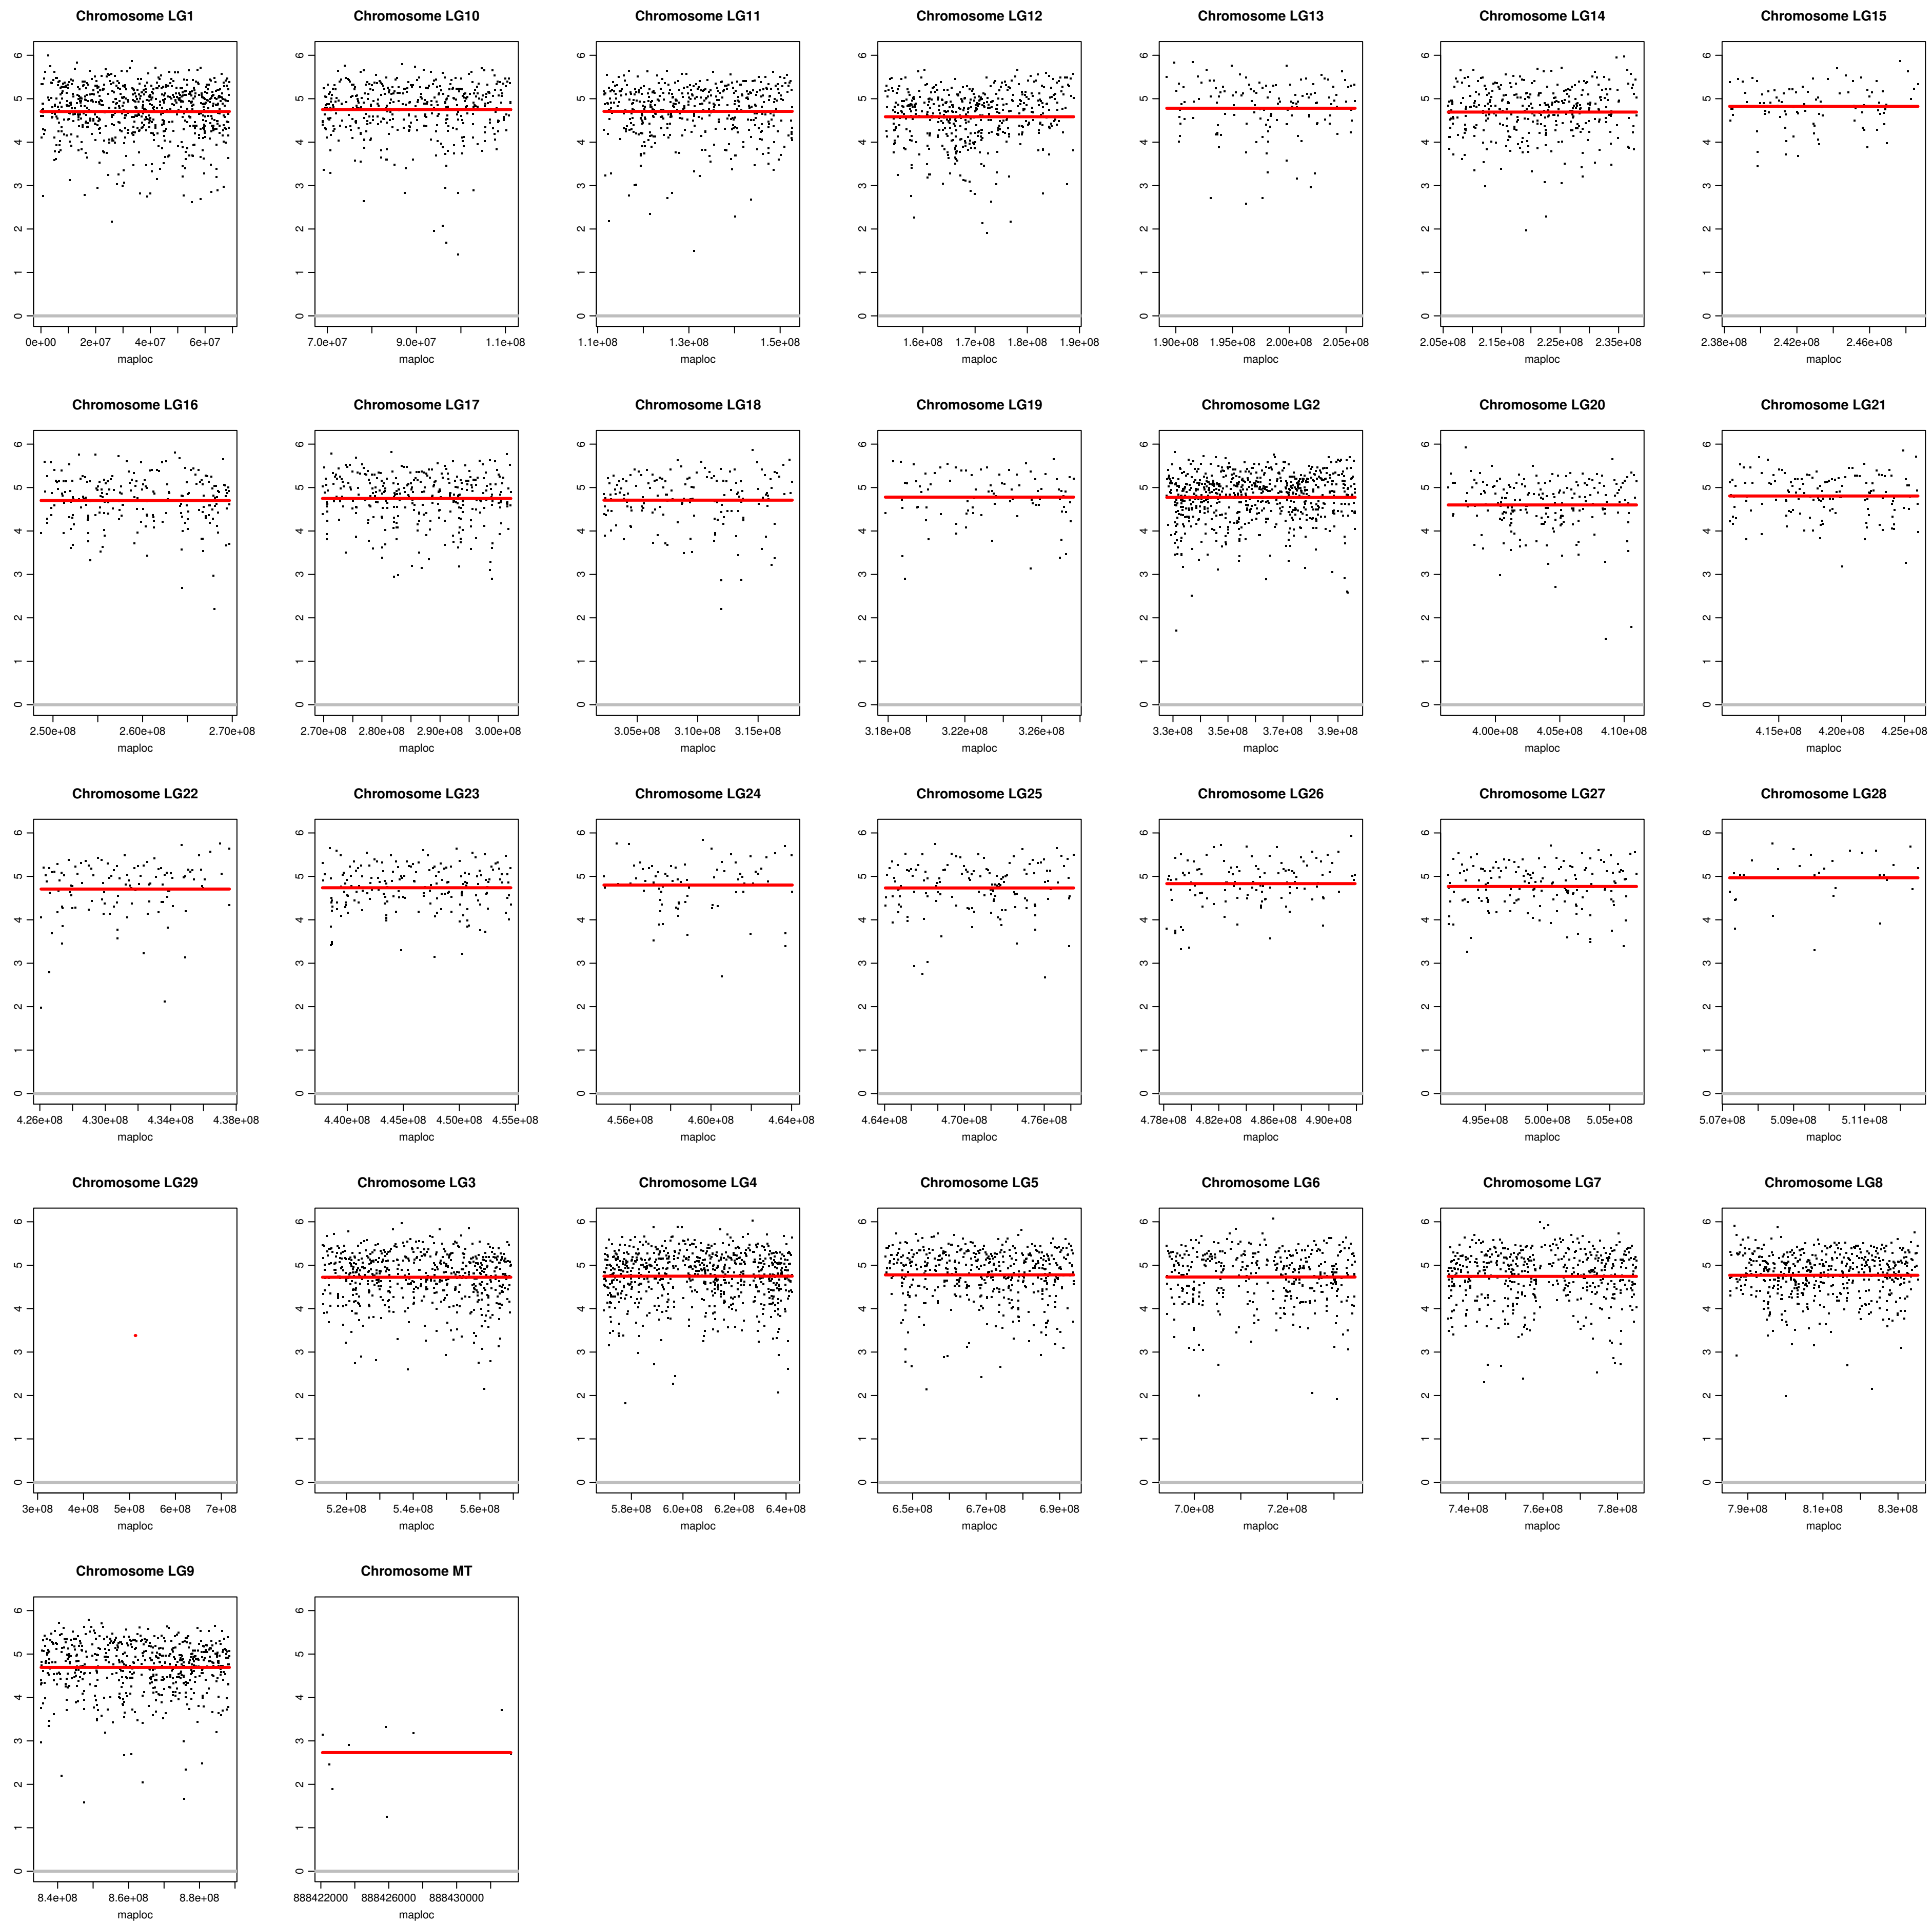

# R61.LepOcu1

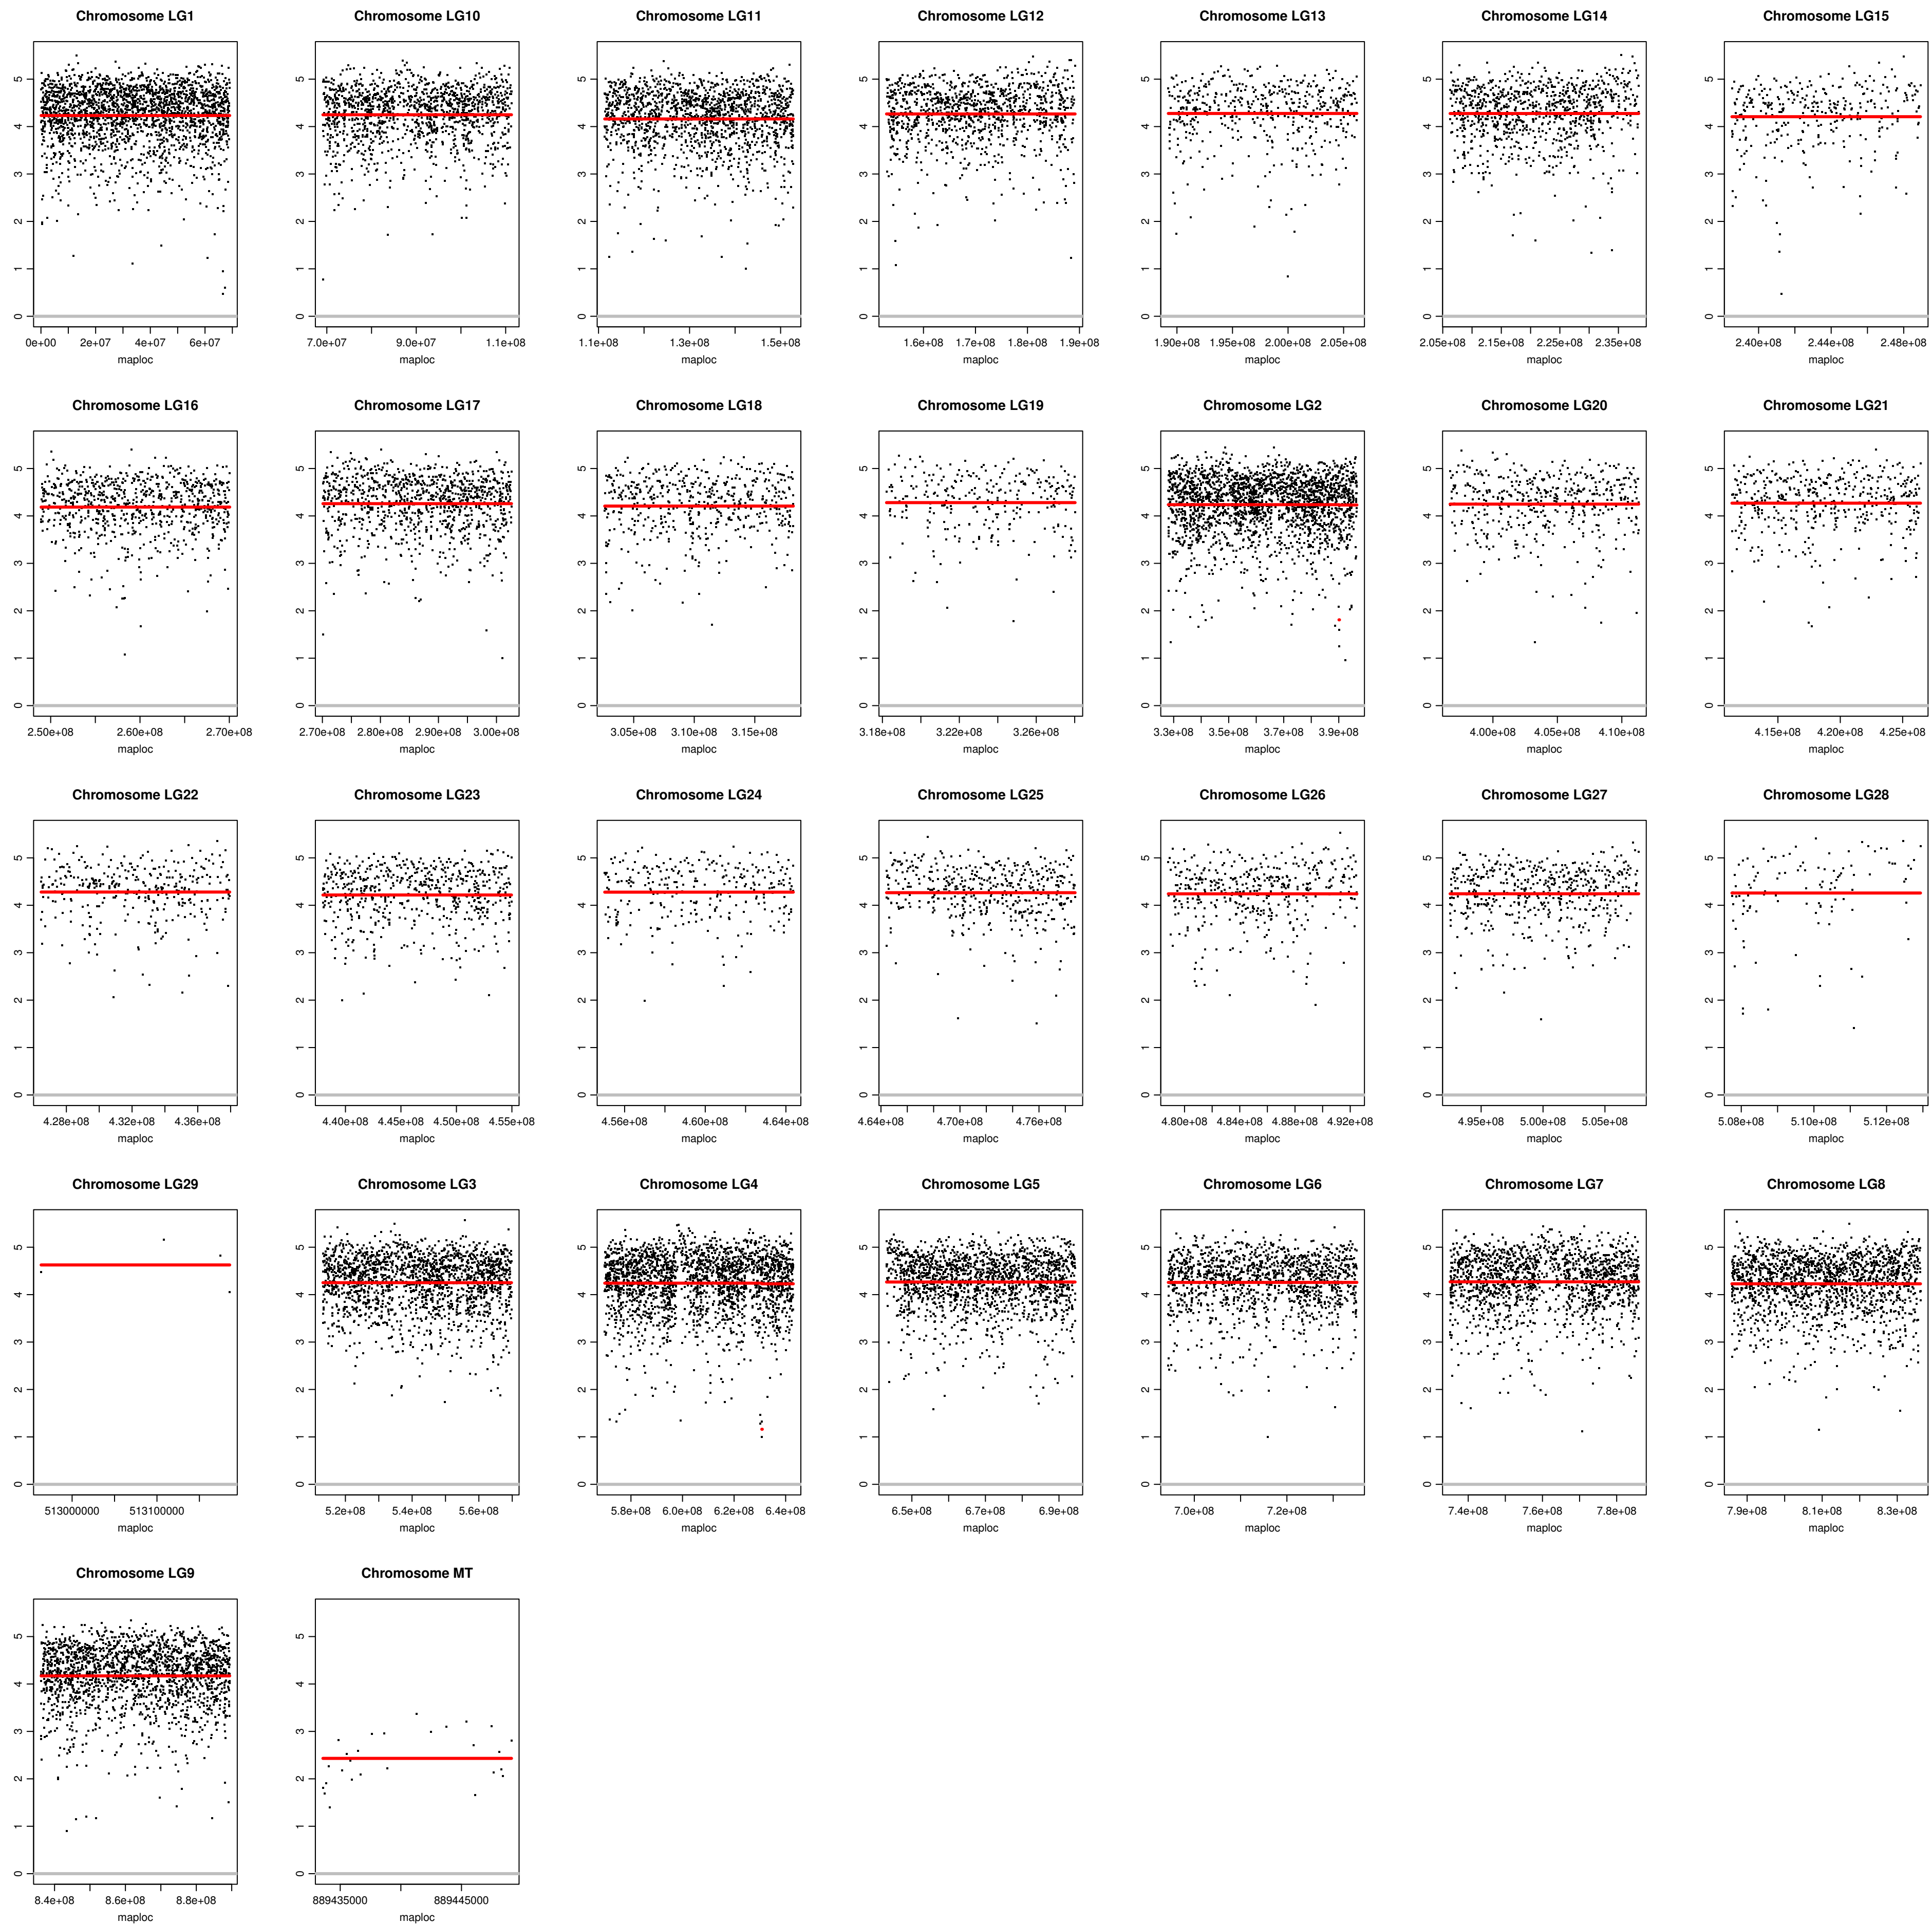



R69.LepOcu1

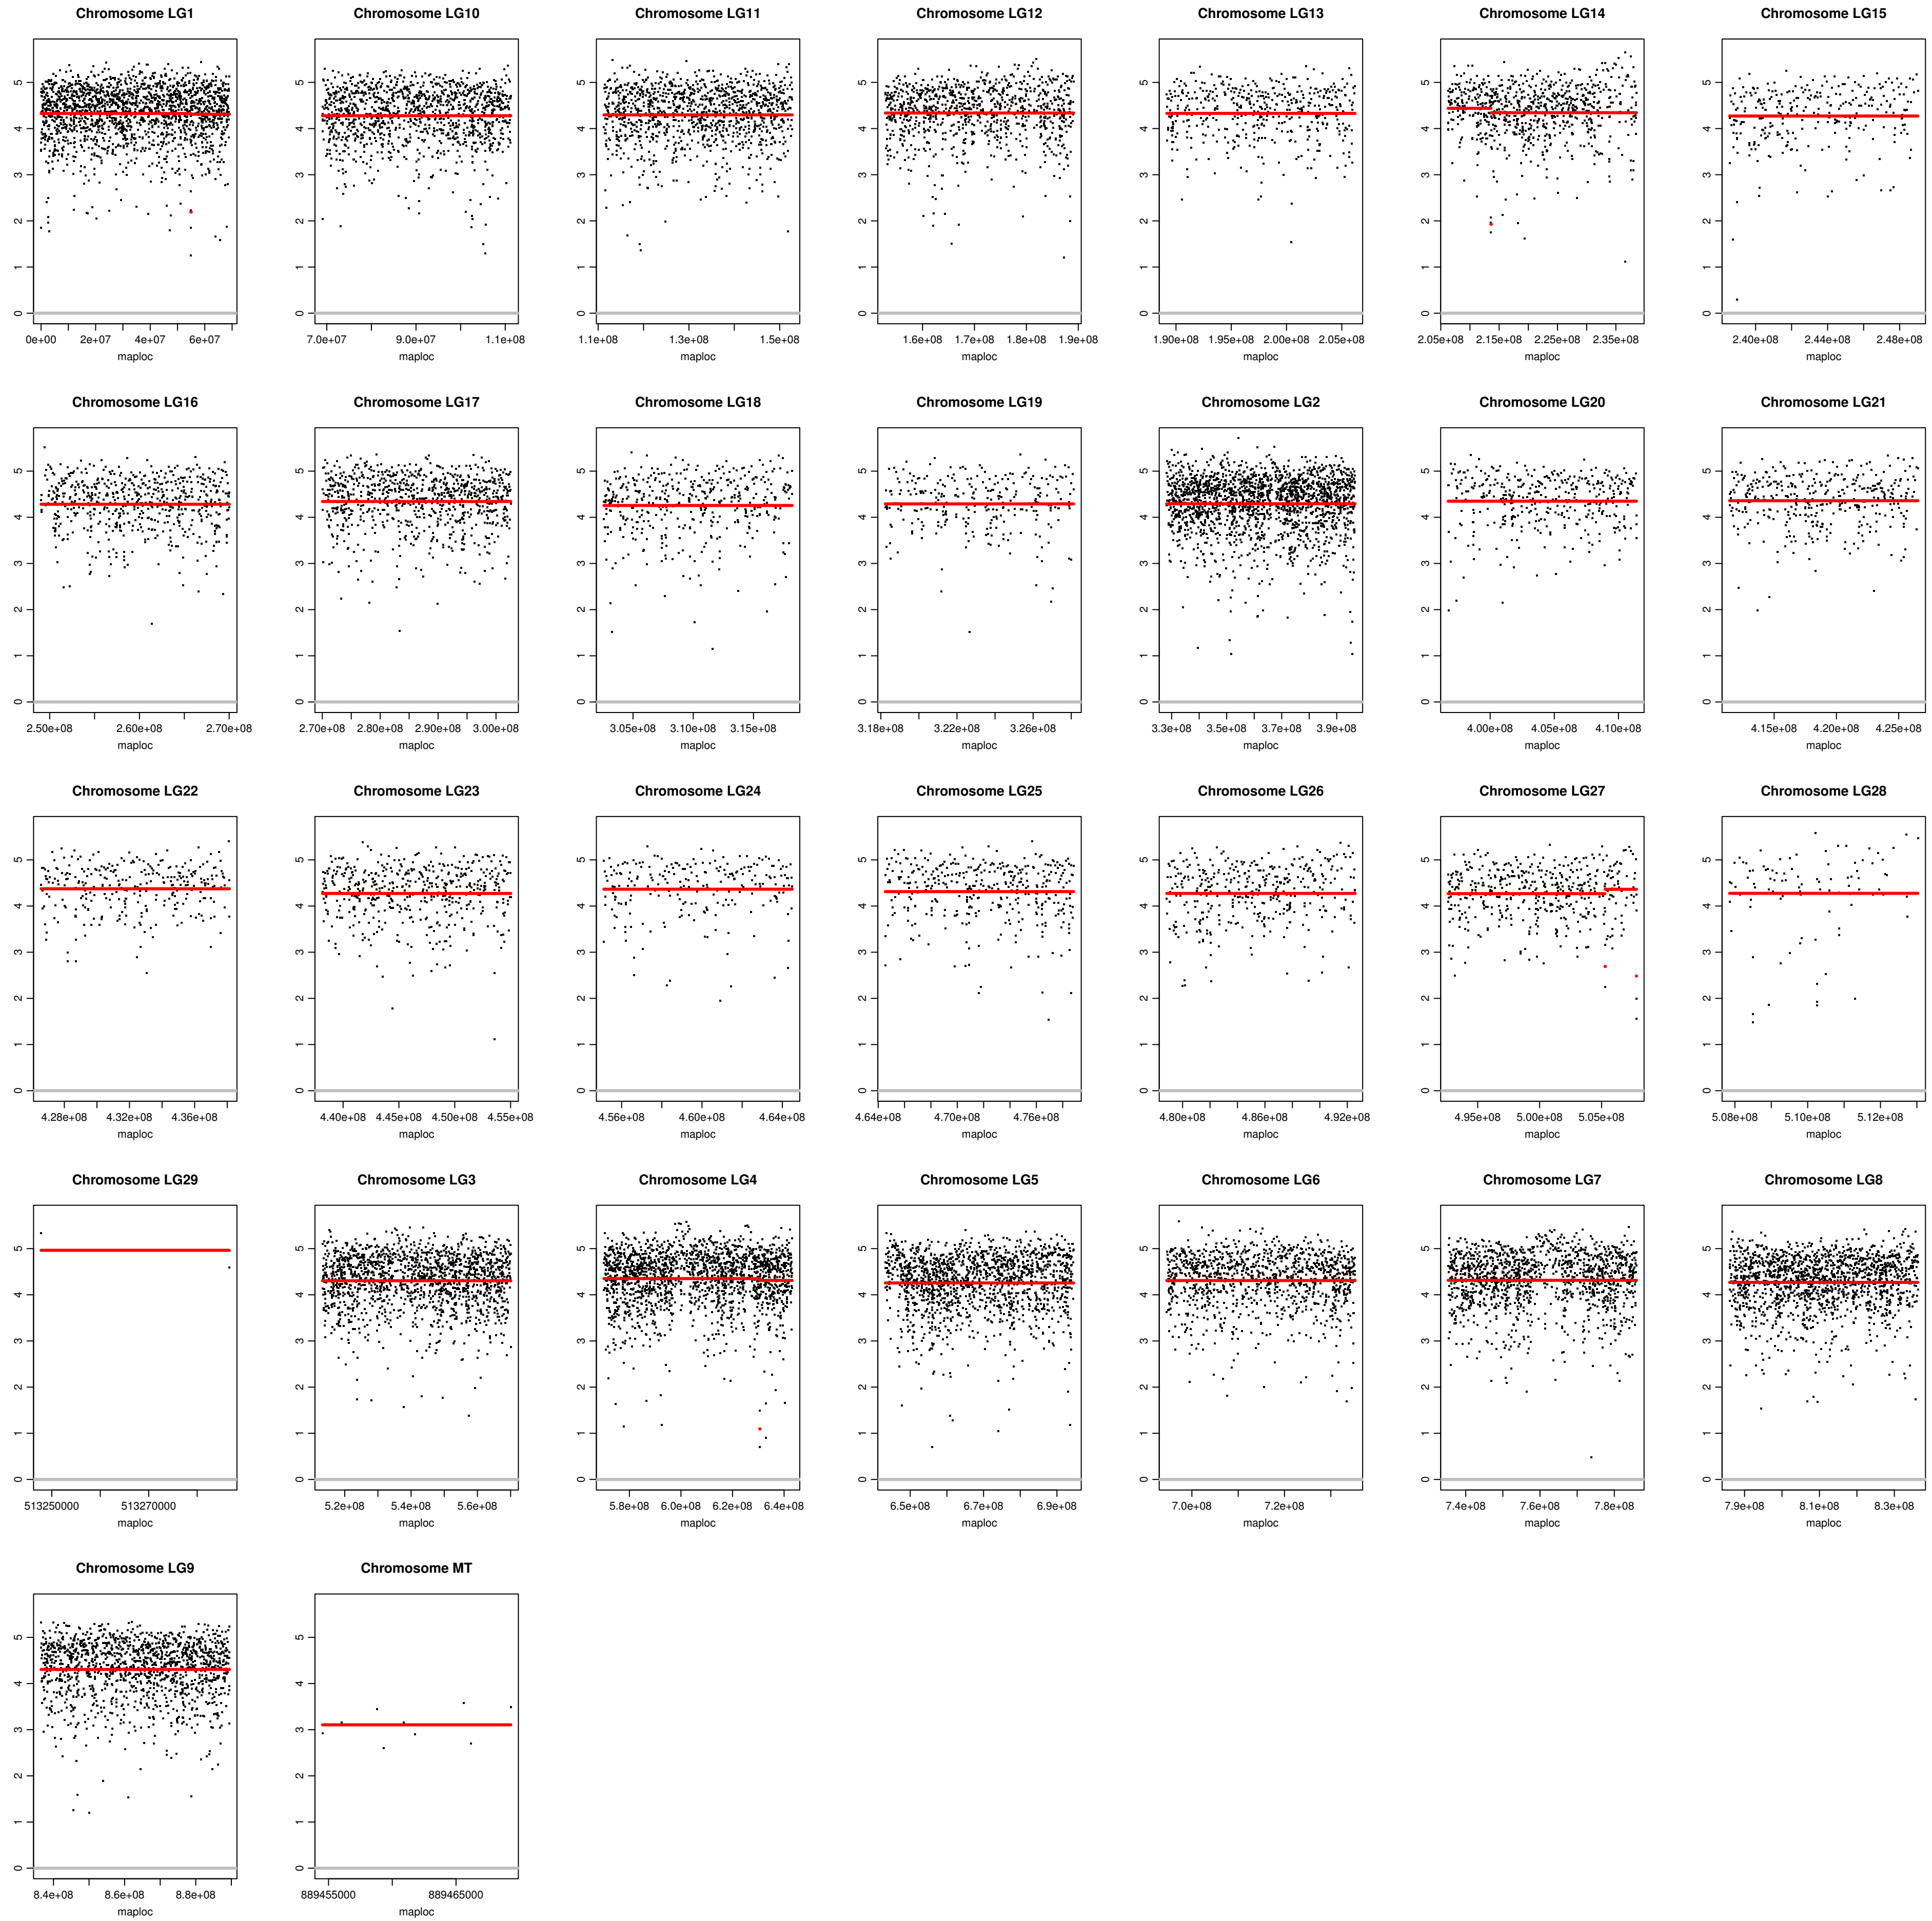

R70.LepOcu1

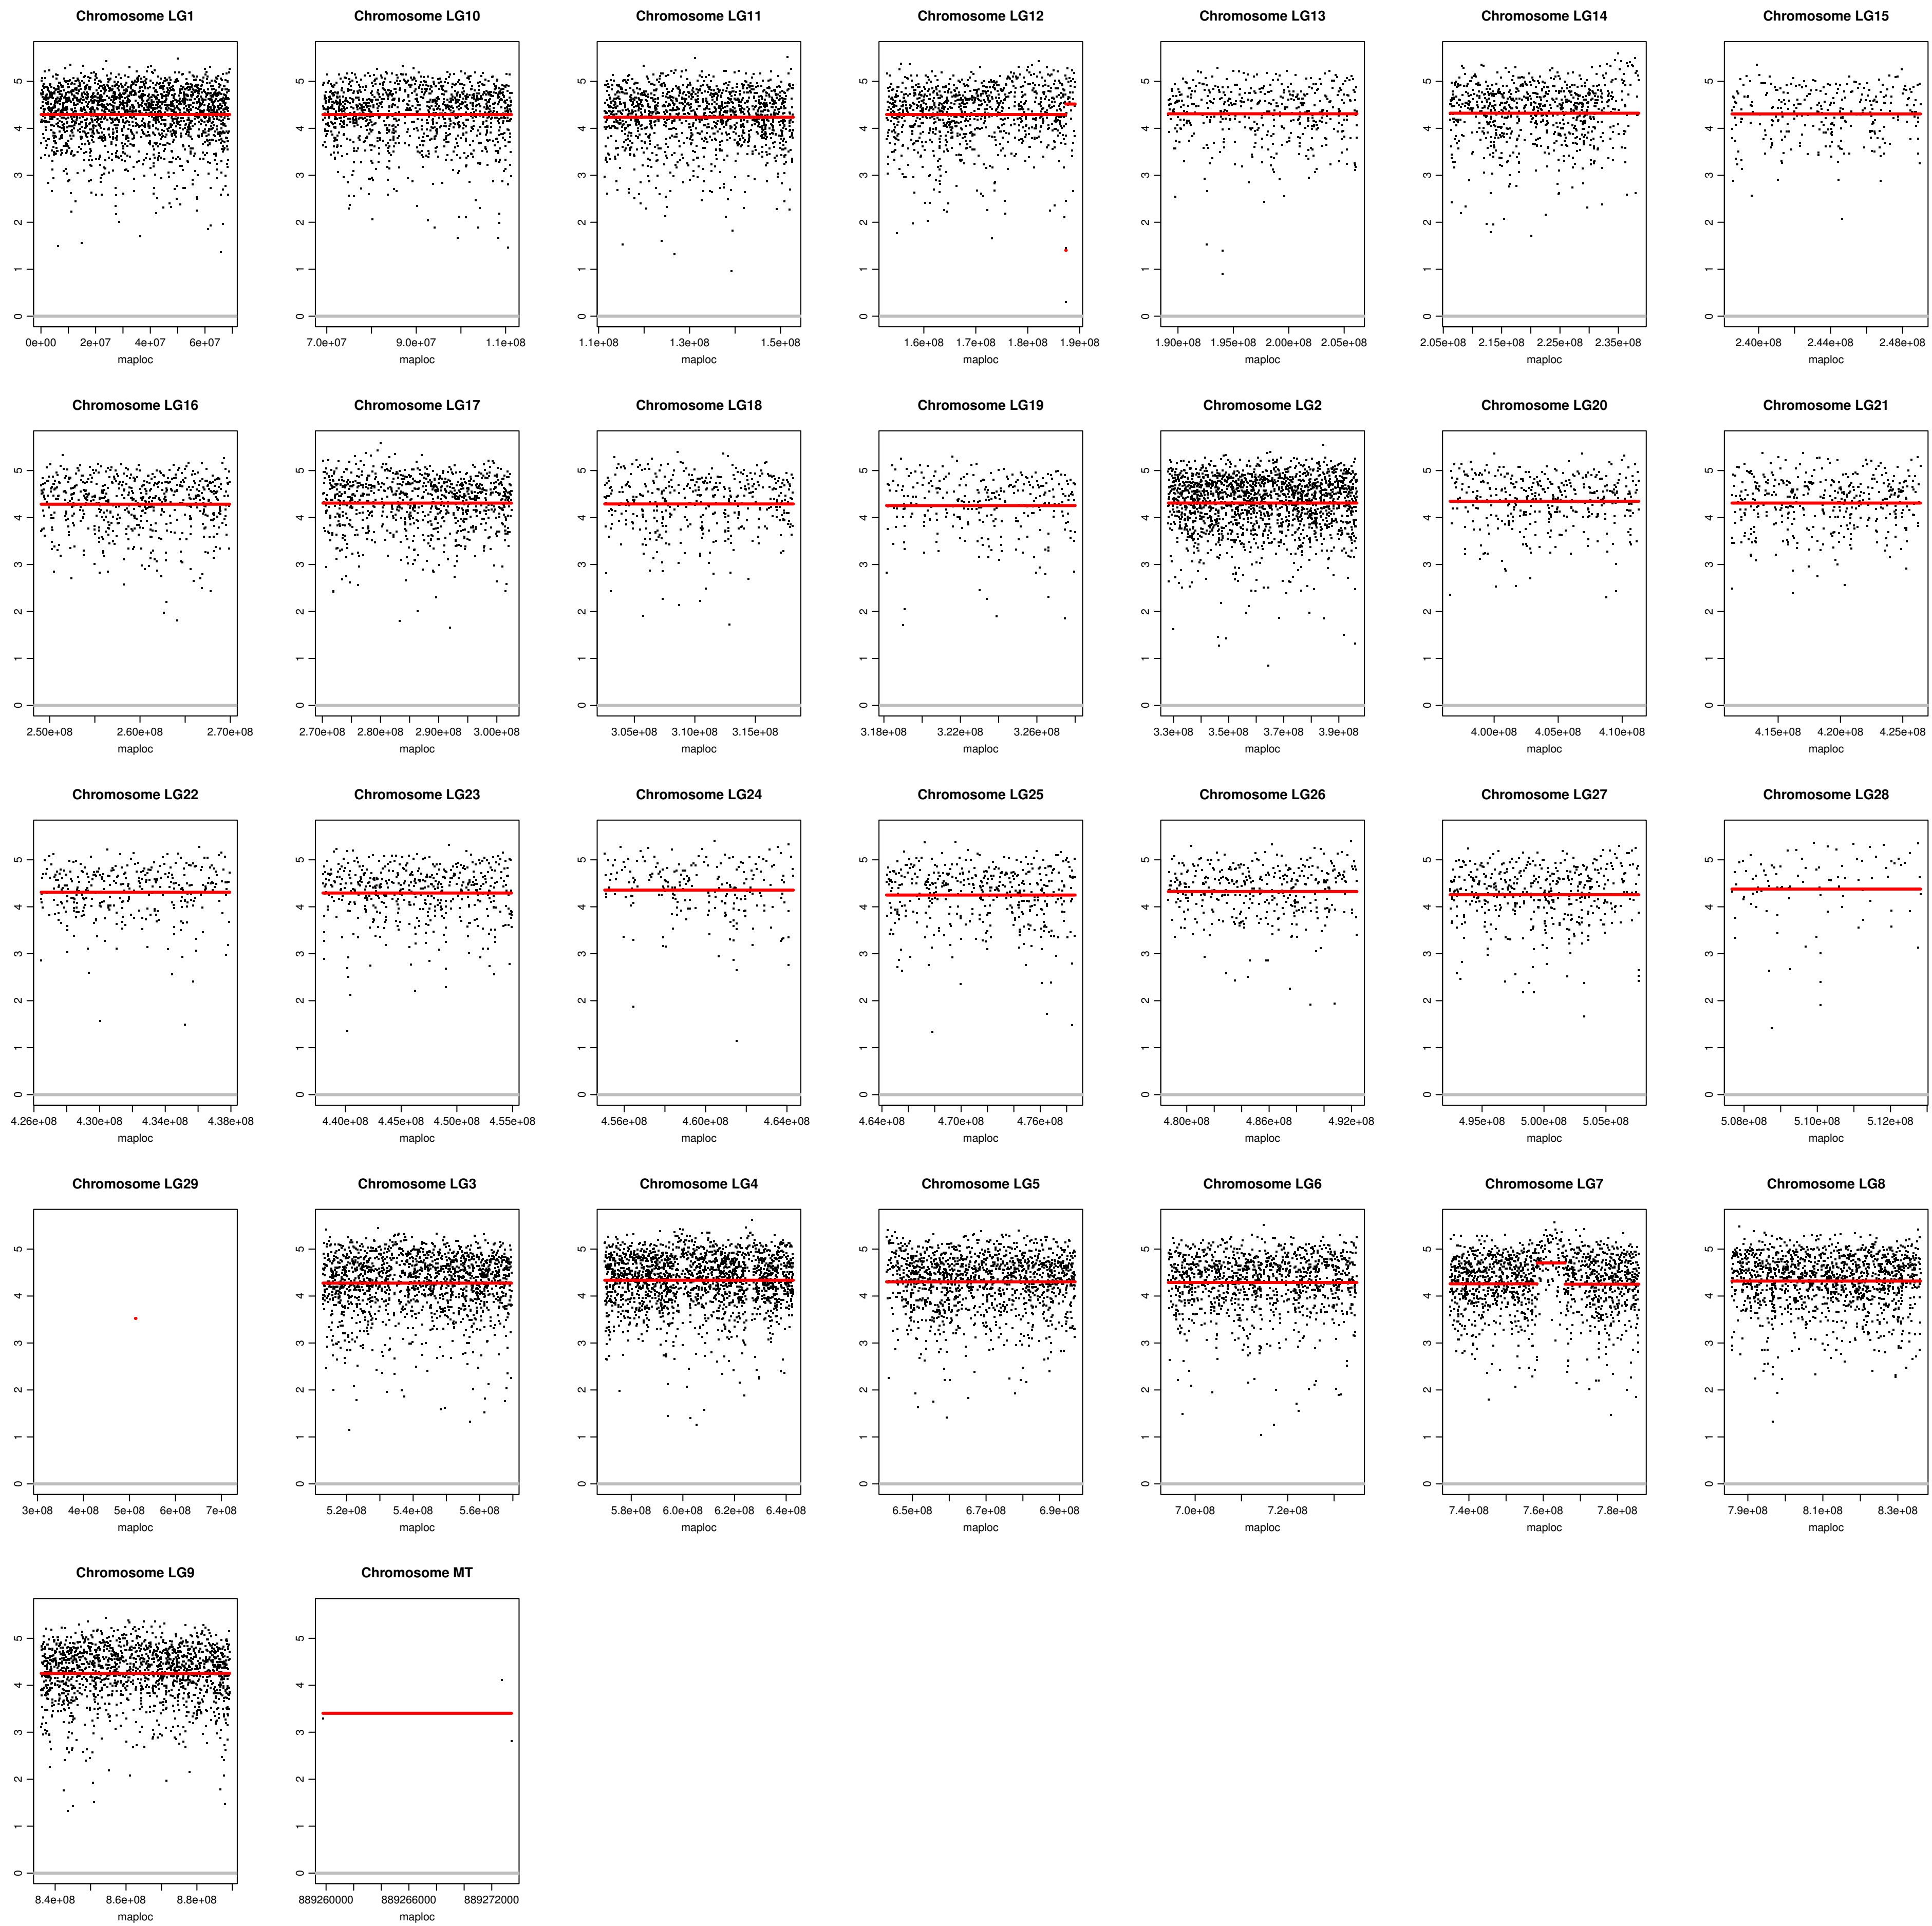

Supplement: s1 [file s1]
